# Supplementary material for: Potential Molecular Mechanism of the NPPB Gene in Postischemic Heart Failure with and without T2DM
Source: Biomed Res Int. 2020 Aug 3;2020:2159460. doi: 10.1155/2020/2159460 (PMC7424400; doi:10.1155/2020/2159460)
Supplement: Supplementary 5 — Table S1: the GO and KEGG pathways in DHF patients. [file 2159460.f5.xlsx]

## Sheet: GO
Category	Term	Count	%	PValue	Genes	List Total	Pop Hits	Pop Total	Fold Enrichment	Bonferroni	Benjamini	FDR
BP	GO:0006099~tricarboxylic acid cycle	13	0.00904285	6.37119e-09	DLST, ACO2, CS, OGDHL, IDH3B, OGDH, PDHB, NNT, IDH3G, SDHC, DLD, PDHA1, MDH2	854	29	16792	8.81434	2.01965e-05	2.01965e-05	1.15428e-05
BP	GO:0006120~mitochondrial electron transport, NADH to ubiquinone	16	0.0111297	1.06586e-08	NDUFA2, NDUFB6, NDUFA8, NDUFA9, NDUFB8, NDUFA6, NDUFB9, NDUFAB1, COQ9, NDUFA10, NDUFV3, NDUFS4, DLD, NDUFS3, NDUFS2, NDUFS1	854	49	16792	6.42049	3.3787e-05	1.68937e-05	1.93104e-05
BP	GO:0055114~oxidation-reduction process	62	0.0431274	1.10138e-07	MRPS36, C5ORF63, LDHB, PXDN, GMPR2, KCNAB2, LDHD, HIBADH, MTHFD1L, MTHFD1, PECR, PLOD1, GPX3, VKORC1, LOXL3, LOX, NQO1, LOXL1, RTN4IP1, RNLS, AIFM1, MICAL2, CYCS, CYB5A, CYB5B, GMPR, NDUFA10, DDO, COQ6, DHRS1, PYCR1, NNT, G6PD, PRDX6, ZADH2, PCYOX1, ME3, CYP1B1, ALDH18A1, ADHFE1, FDX1, VCAM1, P3H1, ALDH1A3, DHCR7, CYP26B1, BDH1, NSDHL, GLRX, PTGR2, NDUFA8, NDUFA6, DHRS11, MAOB, MSRB2, SDHC, AKR1B…	854	592	16792	2.05928	0.000349076	0.000116372	0.000199539
BP	GO:0032981~mitochondrial respiratory chain complex I assembly	16	0.0111297	4.24048e-07	NDUFA2, NDUFB6, NDUFA8, NDUFA9, NDUFB8, AIFM1, NDUFA6, NDUFB9, NDUFAB1, NDUFA10, NDUFV3, NDUFS4, ACAD9, NDUFS3, NDUFS2, NDUFS1	854	63	16792	4.99372	0.00134333	0.000336002	0.000768256
BP	GO:0030198~extracellular matrix organization	29	0.0201725	7.09579e-07	PXDN, PDGFA, TNC, COL3A1, ITGA11, DAG1, ITGB5, ABI3BP, VCAM1, COMP, TGFBI, SERPINE1, LOX, THBS1, LAMB1, LOXL1, FN1, COL4A2, OLFML2B, FBN1, SPARC, COL5A2, COL5A1, EGFLAM, BGN, COL1A2, MFAP2, VCAN, COL1A1	854	196	16792	2.90929	0.00224684	0.000449772	0.00128555
BP	GO:0030199~collagen fibril organization	12	0.00834725	2.46447e-06	CYP1B1, TGFBR1, COL3A1, COL1A2, COL1A1, LOX, ADAMTS2, SERPINH1, COL5A2, COL5A1, TGFB2, DPT	854	39	16792	6.05008	0.00778195	0.00130122	0.00446485
BP	GO:0006334~nucleosome assembly	18	0.0125209	0.000105617	HIST1H1D, HIST1H1C, ANP32C, HIST1H1A, HIST1H2BG, TSPYL4, NAP1L4, TSPYL1, HIST1H2BM, HIST1H2BI, ANP32A, HIST1H3B, HIST1H4F, HIST1H4C, HIST3H2BB, HIST1H3F, ASF1B, HIST1H3I	854	119	16792	2.9742	0.284535	0.0467058	0.191175
BP	GO:0006103~2-oxoglutarate metabolic process	7	0.00486923	0.000185035	GOT2, MRPS36, GOT1, ADHFE1, DLD, IDH3B, OGDH	854	18	16792	7.64663	0.443793	0.070703	0.334702
BP	GO:0009083~branched-chain amino acid catabolic process	7	0.00486923	0.000258871	BCAT1, MCCC2, ACADSB, MCCC1, DLD, ACAT1, HIBADH	854	19	16792	7.24418	0.559888	0.0871574	0.467965
BP	GO:0030574~collagen catabolic process	12	0.00834725	0.000342365	COL4A2, COL3A1, MRC2, MMP19, MMP27, COL1A2, COL1A1, MMP14, ADAMTS2, PHYKPL, COL5A2, COL5A1	854	64	16792	3.68677	0.662261	0.102864	0.618458
BP	GO:0007507~heart development	22	0.0153033	0.000410782	MYL2, ERBB4, MICAL2, TBX5, TGFBR1, COL3A1, FBN1, SMYD1, FGF12, SPARC, TGFB1, TGFB2, MTHFD1, HAND1, ROBO1, PKP2, CASP7, TEK, PTN, SHC1, ADAM19, LOX	854	183	16792	2.36383	0.728134	0.111663	0.741614
BP	GO:0006744~ubiquinone biosynthetic process	6	0.00417362	0.000455616	COQ2, COQ8A, COQ10A, COQ9, PDSS2, COQ6	854	14	16792	8.4269	0.764167	0.113422	0.82224
BP	GO:0042060~wound healing	13	0.00904285	0.000680016	S100A8, PDGFA, TGFBR1, TNC, COL3A1, TGFB3, DSP, EPB41L4B, LOX, SPARC, FN1, TGFB2, TIMP1	854	80	16792	3.1952	0.884257	0.152848	1.22486
BP	GO:0002576~platelet degranulation	15	0.0104341	0.000699664	PDGFA, PSAP, TGFB3, ACTN1, SPARC, TGFB1, TIMP1, TGFB2, PPBP, SERPINE1, ABCC4, THBS1, EGF, PROS1, FN1	854	103	16792	2.86351	0.891251	0.146559	1.26004
BP	GO:0008152~metabolic process	20	0.0139121	0.000906823	BCAT1, ECI2, DLST, ECH1, NCEH1, ARSE, ACO2, EHHADH, ACSBG2, ACAT1, GSTM5, LPCAT4, ACSF2, SULF2, CDYL2, AGPAT4, ACOD1, SCP2, GSTP1, ACAA1	854	168	16792	2.34081	0.943636	0.174469	1.63023
BP	GO:0009060~aerobic respiration	8	0.00556483	0.00113983	UQCRC2, ME3, COX11, FXN, COX10, SDHC, COX6A1, SIRT3	854	33	16792	4.76673	0.973091	0.202247	2.04503
BP	GO:0040020~regulation of meiotic nuclear division	4	0.00278242	0.00120923	PDE3A, CDC20, CALR, GPR3	854	5	16792	15.7302	0.978411	0.201981	2.16827
BP	GO:0007262~STAT protein import into nucleus	4	0.00278242	0.00120923	HES1, JAK3, EGF, F2R	854	5	16792	15.7302	0.978411	0.201981	2.16827
BP	GO:0006635~fatty acid beta-oxidation	9	0.00626043	0.00149091	CPT1C, ACADVL, ECI2, ECH1, EHHADH, ECHS1, DECR1, ACAT1, ACAA1	854	44	16792	4.02193	0.991171	0.231075	2.66693
BP	GO:0046487~glyoxylate metabolic process	7	0.00486923	0.00161975	DLST, DLD, NDUFAB1, PDHA1, OGDH, DDO, PDHB	854	26	16792	5.29382	0.994135	0.236973	2.89422
BP	GO:0044281~small molecule metabolic process	4	0.00278242	0.0023271	ISCU, FXN, FDX1, NFS1	854	6	16792	13.1085	0.99938	0.308765	4.13315
BP	GO:0032964~collagen biosynthetic process	4	0.00278242	0.0023271	TRAM2, COL1A1, SERPINH1, COL5A1	854	6	16792	13.1085	0.99938	0.308765	4.13315
BP	GO:0061732~mitochondrial acetyl-CoA biosynthetic process from pyruvate	4	0.00278242	0.0023271	DLD, MPC1, PDHA1, PDHB	854	6	16792	13.1085	0.99938	0.308765	4.13315
BP	GO:0006554~lysine catabolic process	5	0.00347802	0.00235773	DLST, DLD, OGDH, PHYKPL, CRYM	854	12	16792	8.19282	0.999437	0.299755	4.18644
BP	GO:0051881~regulation of mitochondrial membrane potential	7	0.00486923	0.00243057	TUSC2, PYCR1, CLIC1, PRDX3, NDUFS1, PARK7, BCO2	854	28	16792	4.91569	0.999554	0.295769	4.3131
BP	GO:0045471~response to ethanol	14	0.00973845	0.00252938	CCL2, S100A8, TNC, MAOB, GGH, SPARC, VCAM1, GOT2, TYMS, G6PD, SLC2A4, NQO1, AACS, GSTP1	854	105	16792	2.6217	0.999674	0.294646	4.48467
BP	GO:0001568~blood vessel development	8	0.00556483	0.00270071	DHCR7, SPHK1, COL1A2, COL1A1, RAPGEF1, CEACAM1, COL5A1, FOXS1	854	38	16792	4.13953	0.999811	0.300368	4.78147
BP	GO:0032570~response to progesterone	8	0.00556483	0.00314982	CD38, TYMS, CCL2, TGFB3, PTN, THBS1, TGFB1, TGFB2	854	39	16792	4.03339	0.999955	0.329698	5.55534
BP	GO:0060395~SMAD protein signal transduction	10	0.00695604	0.0038922	AFP, BMP1, NCEH1, GDF6, VIM, TGFB3, GDF10, TGFB1, TGFB2, BMP8A	854	62	16792	3.17141	0.999996	0.37841	6.82154
BP	GO:0006768~biotin metabolic process	5	0.00347802	0.00439543	MCCC2, MCCC1, ACACB, PCCB, VNN3	854	14	16792	7.02242	0.999999	0.403809	7.6707
BP	GO:0014003~oligodendrocyte development	6	0.00417362	0.00523427	WASF3, HDAC11, LPAR1, EIF2B3, TGFB1, GSTP1	854	23	16792	5.12942	1	0.447969	9.06995
BP	GO:0046951~ketone body biosynthetic process	4	0.00278242	0.00603481	HMGCS2, AACS, BDH1, ACAT1	854	8	16792	9.83138	1	0.484009	10.3866
BP	GO:1904706~negative regulation of vascular smooth muscle cell proliferation	4	0.00278242	0.00603481	TGFB3, CNN1, IL10, GSTP1	854	8	16792	9.83138	1	0.484009	10.3866
BP	GO:0007155~cell adhesion	37	0.0257373	0.00660081	CCL2, CYP1B1, OPCML, TNC, ITGA11, NEDD9, ITGB5, ITGBL1, VCAM1, ROBO1, COMP, TGFBI, PCDHA10, THBS1, LAMB1, BOC, THBS2, CEACAM1, DPT, FN1, CD99, CERCAM, TPBG, GRHL2, COL5A1, THY1, HES1, ATP2A2, NLGN4Y, LSAMP, CD99L2, VCAN, COL1A1, MFAP4, ABL2, PARVB, MYH10	854	459	16792	1.58502	1	0.503314	11.3066
BP	GO:0061028~establishment of endothelial barrier	5	0.00347802	0.00736976	PPP1R16B, EZR, F2RL1, RAPGEF1, MYADM	854	16	16792	6.14461	1	0.530651	12.5422
BP	GO:0051642~centrosome localization	5	0.00347802	0.00736976	CCDC141, SEMA6A, SYNE2, NUBP1, IFT20	854	16	16792	6.14461	1	0.530651	12.5422
BP	GO:0055010~ventricular cardiac muscle tissue morphogenesis	6	0.00417362	0.00759959	TNNT2, MYL2, HAND1, PKP2, MYH7, TGFB1	854	25	16792	4.71906	1	0.530323	12.9084
BP	GO:0030336~negative regulation of cell migration	12	0.00834725	0.00867418	PODN, CYP1B1, ROBO1, PKP2, TBX5, SERPINE1, DAG1, PTN, DPYSL3, TCAF1, DACH1, THY1	854	95	16792	2.48372	1	0.566941	14.6012
BP	GO:0001501~skeletal system development	15	0.0104341	0.00989837	AEBP1, BMP1, ARSE, TGFBR1, COL3A1, FBN1, COL5A2, TGFB2, COMP, TEAD4, COL1A2, GDF10, VCAN, COL1A1, BMPR1B	854	137	16792	2.15286	1	0.604449	16.4917
BP	GO:0007568~aging	17	0.0118253	0.00991104	CCL2, GNAO1, COL3A1, TGFB3, IL10, TGFB1, KCNMB1, SIRT3, TIMP1, VCAM1, TYMS, HTRA2, SERPINF1, CASP7, DLD, RGN, NQO1	854	165	16792	2.02586	1	0.594298	16.5111
BP	GO:0030307~positive regulation of cell growth	11	0.00765164	0.00998033	HYAL1, CD38, S100A8, DDX3X, PPP1R1C, FXN, DNPH1, TGFBR1, SPHK1, MMP14, TGFB2	854	84	16792	2.57489	1	0.586558	16.6169
BP	GO:0010862~positive regulation of pathway-restricted SMAD protein phosphorylation	8	0.00556483	0.0101675	BMP1, GDF6, TGFBR1, TGFB3, GDF10, TGFB1, TGFB2, BMP8A	854	48	16792	3.27713	1	0.583373	16.902
BP	GO:1902600~hydrogen ion transmembrane transport	9	0.00626043	0.0116339	SLC36A1, SLC36A2, COX11, NNT, COX10, COX4I1, COX6A1, CYB5A, TMCO3	854	61	16792	2.90106	1	0.623259	19.1043
BP	GO:0048048~embryonic eye morphogenesis	4	0.00278242	0.011982	ALDH1A3, EFEMP1, FBN1, MFAP2	854	10	16792	7.86511	1	0.624616	19.619
BP	GO:0019228~neuronal action potential	6	0.00417362	0.0124014	SCN3A, P2RX1, KCNA2, P2RX3, SCN11A, SCN5A	854	28	16792	4.21345	1	0.628035	20.2349
BP	GO:0016525~negative regulation of angiogenesis	9	0.00626043	0.0127808	COL4A2, CCL2, SERPINF1, TEK, NPPB, PTN, SPARC, THBS1, THBS2	854	62	16792	2.85427	1	0.630107	20.7882
BP	GO:0055088~lipid homeostasis	7	0.00486923	0.0131179	ACADVL, ACADSB, PKP2, CETP, ACAD9, PNPLA4, ETFA	854	39	16792	3.52921	1	0.630882	21.2768
BP	GO:0048050~post-embryonic eye morphogenesis	3	0.00208681	0.0144401	EFEMP1, FBN1, MFAP2	854	4	16792	14.7471	1	0.657779	23.1659
BP	GO:0006533~aspartate catabolic process	3	0.00208681	0.0144401	GOT2, GOT1, DDO	854	4	16792	14.7471	1	0.657779	23.1659
BP	GO:0035910~ascending aorta morphogenesis	3	0.00208681	0.0144401	HES1, HEY2, TGFB2	854	4	16792	14.7471	1	0.657779	23.1659
BP	GO:0030324~lung development	10	0.00695604	0.0146028	HES1, RAB3A, TBX5, DHCR7, FSTL3, PTN, LOX, SPARC, MMP14, ADAMTS2	854	76	16792	2.58721	1	0.653483	23.3954
BP	GO:0034599~cellular response to oxidative stress	9	0.00626043	0.0153196	PYCR1, G6PD, HTRA2, ATP2A2, NFE2L1, PRDX3, PRR5L, ETV5, PARK7	854	64	16792	2.76508	1	0.662954	24.3988
BP	GO:0007005~mitochondrion organization	10	0.00695604	0.0158153	RAB32, RAB3A, ALAS1, FXN, HTRA2, AGTPBP1, CYCS, PRDX3, PARK7, SIRT3	854	77	16792	2.55361	1	0.66666	25.0853
BP	GO:2000377~regulation of reactive oxygen species metabolic process	5	0.00347802	0.0167002	TUSC2, EIF6, CYP1B1, FOXM1, BCO2	854	20	16792	4.91569	1	0.678863	26.2963
BP	GO:0006006~glucose metabolic process	9	0.00626043	0.019785	SLC25A11, G6PD, ALDH5A1, FBN1, PDHA1, GDPGP1, PDHB, AKT2, PGM2L1	854	67	16792	2.64127	1	0.732793	30.3748
BP	GO:0045333~cellular respiration	5	0.00347802	0.0198195	NDUFS4, COX10, CYCS, COQ10A, NDUFS1	854	21	16792	4.68161	1	0.726124	30.4192
BP	GO:0032496~response to lipopolysaccharide	16	0.0111297	0.0199778	IL23R, S100A8, MAOB, MAPKAPK3, SPARC, PRDX3, COMT, PTGFR, JUNB, NOCT, VCAM1, APOB, PPBP, PLCG2, LOXL1, F2R	854	164	16792	1.91832	1	0.7218	30.6225
BP	GO:0042574~retinal metabolic process	4	0.00278242	0.0203625	CYP1B1, ALDH1A3, BCO1, BCO2	854	12	16792	6.55425	1	0.72161	31.1142
BP	GO:0043206~extracellular fibril organization	4	0.00278242	0.0203625	LTBP2, COL3A1, MFAP4, COL5A1	854	12	16792	6.55425	1	0.72161	31.1142
BP	GO:0010510~regulation of acetyl-CoA biosynthetic process from pyruvate	4	0.00278242	0.0203625	PDP1, DLD, PDHA1, PDHB	854	12	16792	6.55425	1	0.72161	31.1142
BP	GO:0006457~protein folding	17	0.0118253	0.0211915	GRPEL1, GNAO1, PPIL1, SPHK1, PDIA4, CALR, P3H1, NUDCD3, CLGN, GNB1, BAG2, DNAJC7, PPIL3, GNG2, FKBP10, DNAJC1, DNAJC19	854	180	16792	1.85704	1	0.729032	32.1628
BP	GO:0006335~DNA replication-dependent nucleosome assembly	6	0.00417362	0.0215186	HIST1H3B, HIST1H4F, HIST1H4C, ASF1B, HIST1H3F, HIST1H3I	854	32	16792	3.68677	1	0.727769	32.5723
BP	GO:0043434~response to peptide hormone	7	0.00486923	0.0229406	ATP2A2, TEK, DAG1, COL1A1, SPARC, EIF2B3, TIMP1	854	44	16792	3.12817	1	0.743951	34.3257
BP	GO:0006102~isocitrate metabolic process	3	0.00208681	0.0232607	IDH3G, ACO2, IDH3B	854	5	16792	11.7977	1	0.742439	34.7143
BP	GO:0010757~negative regulation of plasminogen activation	3	0.00208681	0.0232607	SERPINE2, SERPINE1, THBS1	854	5	16792	11.7977	1	0.742439	34.7143
BP	GO:0010936~negative regulation of macrophage cytokine production	3	0.00208681	0.0232607	TGFB3, TGFB1, TGFB2	854	5	16792	11.7977	1	0.742439	34.7143
BP	GO:0006532~aspartate biosynthetic process	3	0.00208681	0.0232607	GOT2, BCAT1, GOT1	854	5	16792	11.7977	1	0.742439	34.7143
BP	GO:0006090~pyruvate metabolic process	5	0.00347802	0.0232745	LDHB, ME3, DLD, PDHA1, PDHB	854	22	16792	4.46881	1	0.736335	34.7311
BP	GO:0046427~positive regulation of JAK-STAT cascade	5	0.00347802	0.0232745	HES1, CYP1B1, AKR1B1, IL10, F2R	854	22	16792	4.46881	1	0.736335	34.7311
BP	GO:0010718~positive regulation of epithelial to mesenchymal transition	6	0.00417362	0.0243328	TGFBR1, TGFB3, COL1A1, WWTR1, TGFB1, TGFB2	854	33	16792	3.57505	1	0.745888	36.0005
BP	GO:0006536~glutamate metabolic process	4	0.00278242	0.0254903	GOT2, GOT1, ALDH18A1, ALDH5A1	854	13	16792	6.05008	1	0.75616	37.3623
BP	GO:0060389~pathway-restricted SMAD protein phosphorylation	4	0.00278242	0.0254903	GDF6, TGFBR1, TGFB1, TGFB2	854	13	16792	6.05008	1	0.75616	37.3623
BP	GO:0060413~atrial septum morphogenesis	4	0.00278242	0.0254903	NOTCH2, TBX5, HEY2, TGFB2	854	13	16792	6.05008	1	0.75616	37.3623
BP	GO:0009117~nucleotide metabolic process	4	0.00278242	0.0254903	FHIT, DNPH1, PUDP, ACPP	854	13	16792	6.05008	1	0.75616	37.3623
BP	GO:0043588~skin development	6	0.00417362	0.0273731	FRAS1, PDGFA, COL3A1, ADAMTS2, COL5A2, COL5A1	854	34	16792	3.4699	1	0.774904	39.5189
BP	GO:0051591~response to cAMP	7	0.00486923	0.0279668	NDUFS4, MMP19, TEK, PDE3A, COL1A1, SPARC, JUNB	854	46	16792	2.99216	1	0.776565	40.1843
BP	GO:0006469~negative regulation of protein kinase activity	11	0.00765164	0.0287263	PPM1E, BGN, PODN, PPP1R1C, SOCS3, RGN, WWTR1, PARK7, CEACAM1, GSTP1, THY1	854	99	16792	2.18475	1	0.780123	41.0254
BP	GO:0009612~response to mechanical stimulus	8	0.00556483	0.0292457	CCL2, ANKRD23, P2RX3, TNC, COL3A1, THBS1, MMP14, JUNB	854	59	16792	2.66614	1	0.780764	41.5942
BP	GO:0006144~purine nucleobase metabolic process	3	0.00208681	0.0337274	GMPR2, GMPR, ACPP	854	6	16792	9.83138	1	0.822069	46.2911
BP	GO:0060762~regulation of branching involved in mammary gland duct morphogenesis	3	0.00208681	0.0337274	ETV5, TGFB1, ETV4	854	6	16792	9.83138	1	0.822069	46.2911
BP	GO:0006531~aspartate metabolic process	3	0.00208681	0.0337274	GOT2, GOT1, DDO	854	6	16792	9.83138	1	0.822069	46.2911
BP	GO:0000082~G1/S transition of mitotic cell cycle	11	0.00765164	0.0343586	BCAT1, CDC7, TYMS, CDKN1A, CUL4A, CAMK2G, IQGAP3, ID4, CCNA1, RPS6, RPA4	854	102	16792	2.12049	1	0.823025	46.9231
BP	GO:0001525~angiogenesis	19	0.0132165	0.035605	FZD8, COL4A2, CCL2, CYP1B1, PDGFA, MMP19, MMP14, THY1, TGFB2, NUS1, HAND1, TEK, SERPINE1, TGFBI, SHC1, EGF, CEACAM1, FN1, SCG2	854	223	16792	1.6753	1	0.829343	48.1507
BP	GO:0030206~chondroitin sulfate biosynthetic process	5	0.00347802	0.0357178	BGN, XYLT1, CHST11, VCAN, CHST15	854	25	16792	3.93255	1	0.825691	48.2605
BP	GO:0035914~skeletal muscle cell differentiation	7	0.00486923	0.0367832	PHOX2B, MAFF, EGR2, ANKRD2, HIVEP3, SMYD1, KLHL41	854	49	16792	2.80897	1	0.830203	49.2864
BP	GO:0046037~GMP metabolic process	4	0.00278242	0.0376154	GMPR2, MPP1, MPP3, TJP2	854	15	16792	5.2434	1	0.832601	50.0744
BP	GO:0014898~cardiac muscle hypertrophy in response to stress	4	0.00278242	0.0376154	ATP2A2, HEY2, MYH7, NPPA	854	15	16792	5.2434	1	0.832601	50.0744
BP	GO:0009611~response to wounding	8	0.00556483	0.0399378	CCL2, SULF2, PDGFA, TNC, TGFB1, FN1, TGFB2, F2R	854	63	16792	2.49686	1	0.846256	52.2126
BP	GO:0051491~positive regulation of filopodium assembly	5	0.00347802	0.0405713	DNM3, TGFBR1, TGFB3, RHOQ, DPYSL3	854	26	16792	3.7813	1	0.846739	52.7807
BP	GO:0008652~cellular amino acid biosynthetic process	5	0.00347802	0.0405713	GOT2, BCAT1, PYCR1, GOT1, ALDH18A1	854	26	16792	3.7813	1	0.846739	52.7807
BP	GO:0035025~positive regulation of Rho protein signal transduction	5	0.00347802	0.0405713	ROBO1, COL3A1, F2RL1, LPAR1, F2R	854	26	16792	3.7813	1	0.846739	52.7807
BP	GO:0032869~cellular response to insulin stimulus	9	0.00626043	0.0412302	MYO5A, GOT1, CCL2, SLC2A4, GPLD1, RHOQ, CEACAM1, GSTP1, AKT2	854	77	16792	2.29825	1	0.847389	53.3647
BP	GO:2001237~negative regulation of extrinsic apoptotic signaling pathway	6	0.00417362	0.0418828	CFLAR, TGFBR1, THBS1, PARK7, GSTP1, SCG2	854	38	16792	3.10465	1	0.847979	53.9365
BP	GO:0030049~muscle filament sliding	6	0.00417362	0.0418828	TNNT2, DES, MYL2, VIM, MYH7, TPM2	854	38	16792	3.10465	1	0.847979	53.9365
BP	GO:0007179~transforming growth factor beta receptor signaling pathway	10	0.00695604	0.0438595	CCL2, LTBP2, TGFBR1, COL3A1, TGFB3, COL1A2, ITGB5, GDF10, TGFB1, TGFB2	854	92	16792	2.13726	1	0.857386	55.6282
BP	GO:0097194~execution phase of apoptosis	4	0.00278242	0.0445952	CFLAR, HTRA2, CASP7, CECR2	854	16	16792	4.91569	1	0.858332	56.2427
BP	GO:0048642~negative regulation of skeletal muscle tissue development	3	0.00208681	0.0456508	USP2, YBX3, TGFB1	854	7	16792	8.4269	1	0.86123	57.1104
BP	GO:0006734~NADH metabolic process	3	0.00208681	0.0456508	IDH3B, OGDH, MDH2	854	7	16792	8.4269	1	0.86123	57.1104
BP	GO:0007435~salivary gland morphogenesis	3	0.00208681	0.0456508	TGFB3, TGFB1, TGFB2	854	7	16792	8.4269	1	0.86123	57.1104
BP	GO:0003360~brainstem development	3	0.00208681	0.0456508	PHOX2B, ATIC, SCN5A	854	7	16792	8.4269	1	0.86123	57.1104
BP	GO:0006086~acetyl-CoA biosynthetic process from pyruvate	3	0.00208681	0.0456508	DLD, PDHA1, PDHB	854	7	16792	8.4269	1	0.86123	57.1104
BP	GO:0035987~endodermal cell differentiation	5	0.00347802	0.0457801	COL4A2, ITGB5, MMP14, LAMB1, FN1	854	27	16792	3.64125	1	0.858379	57.2156
BP	GO:0042476~odontogenesis	5	0.00347802	0.0457801	MYO5A, TGFB3, COL1A2, LAMB1, TGFB2	854	27	16792	3.64125	1	0.858379	57.2156
BP	GO:0032200~telomere organization	5	0.00347802	0.0457801	HIST1H3B, HIST1H4F, HIST1H4C, HIST1H3F, HIST1H3I	854	27	16792	3.64125	1	0.858379	57.2156
BP	GO:0000302~response to reactive oxygen species	6	0.00417362	0.0461129	HYAL1, PRDX6, CYCS, GPX3, PRDX3, GSTP1	854	39	16792	3.02504	1	0.85681	57.4851
BP	GO:0034097~response to cytokine	7	0.00486923	0.0472029	TYMS, GNAO1, COL3A1, MAPKAPK3, SPARC, JUNB, TIMP1	854	52	16792	2.64691	1	0.859862	58.3567
BP	GO:0001503~ossification	9	0.00626043	0.0498608	BMP1, PDLIM7, GPLD1, FSTL3, MGP, SPARC, RUNX1, COL5A2, BMP8A	854	80	16792	2.21206	1	0.871567	60.4118
CC	GO:0005739~mitochondrion	158	0.109905	2.69963e-25	TUSC2, C5ORF63, MRPS36, FHIT, LDHB, GRPEL1, EHHADH, LDHD, TMEM143, OGDH, MTHFD1L, PDHB, HIBADH, GOT2, PECR, SLC25A20, STARD5, IDH3G, CISD1, GOT1, HTRA2, COQ8A, MRPL37, PDHA1, GNG5, MRPL35, RPUSD4, BLID, PNPLA4, ISCU, PYCR1, NNT, DLD, AKAP1, PCCB, MRPL46, MDH2, ACADSB, ME3, MRPS15, CYP1B1, ADHFE1, ERBB4, FDX1, ALDOC, GSDMC, SFXN3, ACSBG2, ACAT1, NDRG4, NAXD, MAFF, MRPS25, MAOB, MPC1, IDH3B, ACACB,…	909	1331	18224	2.3799	1.4497e-22	1.4497e-22	3.92659e-22
CC	GO:0005759~mitochondrial matrix	62	0.0431274	1.6584e-19	ETNPPL, PDP1, GRPEL1, OGDHL, ACOT2, NDUFAB1, QARS, PRDX3, OGDH, ACSF2, HIBADH, MTHFD1L, PDHB, GOT2, MCCC2, ALAS1, IDH3G, FXN, MCEE, MCCC1, SHC1, PDHA1, NDUFS3, NDUFS2, NDUFS1, SUOX, LYRM7, ACO2, NUDT13, ALDH5A1, ERAL1, DECR1, NDUFA10, ACADVL, PYCR1, ISCU, DLD, PCCB, MDH2, ACADSB, ME3, ADHFE1, ERBB4, FDX1, NFS1, ECHS1, ACAT1, PDSS2, TYMS, PITRM1, BDH1, ETFA, NAXD, DLST, NDUFA9, CS, IDH3B, PARK7, S…	909	327	18224	3.80123	8.90561e-17	4.4528e-17	2.41213e-16
CC	GO:0005743~mitochondrial inner membrane	59	0.0410406	1.2481e-11	UQCRC2, MRPS36, COX11, COX10, LDHD, TIMM17B, NDUFAB1, TIMM50, GOT2, SLC25A20, NDUFS4, GHITM, MCCC1, DNAJC11, SLC25A3, MRPL37, ACAD9, DNAJC19, MRPL35, MRPL51, AIFM1, CYCS, COX4I1, ERAL1, COQ9, CYB5B, NDUFA10, TIMM22, COQ6, DHRS1, ACADVL, COQ2, NNT, MRPL46, MDH2, ALDH18A1, MRPS15, NDUFB6, NDUFB8, NDUFB9, ACAT1, TYMS, CKMT2, NDUFA2, NDUFA8, MRPS25, NDUFA6, MAOB, MPC1, SIRT3, VDAC1, NDUFV3, SLC25A11,…	909	441	18224	2.68221	6.70231e-09	2.2341e-09	1.81535e-08
CC	GO:0031012~extracellular matrix	46	0.0319978	2.11496e-11	FRAS1, AEBP1, PXDN, LTBP1, LTBP2, TNC, VIM, COL3A1, TGFB3, MMP27, RPS15A, CALR, ABI3BP, PCOLCE, TGFB1, TGFB2, SERPINE2, RPS3A, HTRA1, COMP, SERPINE1, TGFBI, HIST1H4F, HIST1H4C, LAMB1, THBS1, LOXL1, THBS2, DPT, FN1, COL4A2, LGALS1, MMP19, EFEMP1, FBN1, MGP, MMP14, COL5A2, COL5A1, BGN, SERPINF1, COL1A2, DSP, VCAN, COL1A1, MFAP4	909	296	18224	3.11563	1.13573e-08	2.83932e-09	3.07618e-08
CC	GO:0070062~extracellular exosome	215	0.149555	2.87677e-11	SCPEP1, FHIT, LDHB, SLC36A2, LTBP2, S100A8, PITPNA, PGAM2, SELENBP1, GOT2, HIST1H2BM, APOB, GOT1, PLOD1, IFT20, HTRA1, HIST1H2BI, SERPINE1, VPS4A, GNG2, GNG5, AUP1, TNIK, C4A, THY1, CD38, SERPINF1, PUDP, RYR2, MDH2, ACADSB, ALDOC, DAG1, CALR, ACP1, ACAT1, SERPINH1, SIAE, SERINC2, P3H1, RILPL2, LAMB1, PTGR2, UPB1, LGALS1, MAOB, GGH, KRT35, VDAC3, ACPP, VDAC1, SYNE2, LASP1, ARF3, HEBP1, MARCKS, CRY…	909	2811	18224	1.53341	1.54483e-08	3.08966e-09	4.18425e-08
CC	GO:0005747~mitochondrial respiratory chain complex I	15	0.0104341	6.93936e-08	NDUFA2, NDUFB6, NDUFA8, NDUFA9, NDUFB8, NDUFA6, NDUFB9, NDUFAB1, NDUFA10, PARK7, NDUFV3, NDUFS4, NDUFS3, NDUFS2, NDUFS1	909	49	18224	6.13727	3.72637e-05	6.21071e-06	0.000100932
CC	GO:0031093~platelet alpha granule lumen	13	0.00904285	1.3129e-05	PDGFA, TGFB3, ACTN1, SPARC, TGFB1, TIMP1, TGFB2, PPBP, SERPINE1, THBS1, EGF, PROS1, FN1	909	55	18224	4.73871	0.00702553	0.00100668	0.0190943
CC	GO:0043209~myelin sheath	22	0.0153033	2.15958e-05	UQCRC2, DLST, LDHB, GNAO1, ACO2, PITPNA, MYO1D, PRDX3, NDUFA10, THY1, VDAC1, GOT2, EZR, GNB1, DLD, SLC25A3, PDHA1, NDUFS3, TUBA1A, DNM1, MDH2, NDUFS1	909	152	18224	2.90174	0.0115301	0.00144858	0.0314063
CC	GO:0005604~basement membrane	15	0.0104341	3.1749e-05	FRAS1, TNC, FBN1, DAG1, SPARC, COL5A1, TIMP1, EGFLAM, SERPINF1, TGFBI, PTN, LAMB1, THBS2, LOXL1, USH2A	909	79	18224	3.80666	0.016905	0.00189259	0.0461687
CC	GO:0000786~nucleosome	15	0.0104341	0.000222491	HIST1H2AB, HIST1H2AC, HIST1H1D, HIST1H1C, HIST1H1A, HIST1H2BG, HIST1H2AE, HIST1H2BM, HIST1H2BI, HIST2H2AC, HIST1H3B, HIST1H4F, HIST1H4C, HIST1H3F, HIST1H3I	909	94	18224	3.19921	0.112628	0.011878	0.323124
CC	GO:0005856~cytoskeleton	36	0.0250417	0.000227587	S100A8, PRC1, WASF3, KCNAB2, MYL2, ALDOC, VIM, DAG1, AKAP12, CALCOCO2, NOSTRIN, EPB41L4B, FRMD3, EZR, HTRA2, FRMD8, TEK, DNAJC7, CNN1, KLHL41, AFAP1, FGD6, TNIK, ENC1, KY, PLEKHH1, FARP1, EVC2, SPAG4, FHOD3, SH3KBP1, OSBPL10, DSP, JAK3, PARVB, ADD1	909	371	18224	1.9454	0.115053	0.0110501	0.330513
CC	GO:0005925~focal adhesion	37	0.0257373	0.000299098	MPZL1, PDLIM7, TNC, VIM, ITGA11, DAG1, AKAP12, FHL2, NEDD9, ITGB5, CALR, SPRY4, ANXA6, EZR, ATAT1, ARPC3, RPS3A, STARD8, TEK, SNTB2, CNN1, RPL7A, AFAP1, MRC2, ACTN1, CD99, MMP14, THY1, ARHGAP31, SYNE2, LASP1, SH3KBP1, CD99L2, MARCKS, PARVB, ADD1, PNMA1	909	391	18224	1.89716	0.148401	0.0132974	0.434155
CC	GO:0005578~proteinaceous extracellular matrix	28	0.0194769	0.00041816	PXDN, LTBP1, PODN, BMP1, LTBP2, OLFML2B, LGALS1, FBN1, EFEMP1, MMP19, GPLD1, MGP, SPARC, CALR, COL5A2, TGFB1, COL5A1, TIMP1, P3H1, BGN, COMP, TGFBI, COL1A2, VCAN, LOX, ADAMTS2, DPT, FN1	909	268	18224	2.09461	0.201163	0.0171284	0.60649
CC	GO:0045252~oxoglutarate dehydrogenase complex	4	0.00278242	0.00114296	DLST, DLD, OGDHL, OGDH	909	5	18224	16.0387	0.458883	0.0429175	1.64962
CC	GO:0005615~extracellular space	92	0.0639955	0.00170128	PXDN, AEBP1, LTBP2, S100A8, PDGFA, GDF6, FSTL3, TGFB3, GPLD1, SELENBP1, FGF12, IL10, TGFB1, TGFB2, APOB, SERPINE2, HTRA1, PAPPA, SCRG1, HIST1H2BI, GPX3, TGFBI, SERPINE1, SEMA3D, CETP, LOXL3, LOX, LOXL1, VNN3, HYAL1, RNLS, C4A, ACTN1, CLIC1, SERPINF1, PPBP, COLQ, PRDX6, CPXM1, COL1A2, NPPB, VCAN, COL1A1, PROS1, NPPA, GSTP1, CCL2, PODN, TNC, COL3A1, DAG1, GPRC5B, CALR, SERPINH1, PCOLCE, MANF, ABI3B…	909	1347	18224	1.3693	0.599228	0.0591368	2.44618
CC	GO:0005788~endoplasmic reticulum lumen	20	0.0139121	0.00344089	COL4A2, ARSE, PDGFA, COL3A1, PDIA4, CALR, CERCAM, COL5A2, COLGALT1, SERPINH1, COL5A1, MTTP, P3H1, APOB, TMEM43, COL1A2, COL1A1, THBS1, FKBP10, RCN3	909	192	18224	2.08838	0.842911	0.109243	4.88978
CC	GO:0044297~cell body	10	0.00695604	0.00382946	GNAO1, EZR, GNB1, MAPT, DPYSL3, MAPK8IP1, COMT, RPS6, RPL28, PARK7	909	63	18224	3.18229	0.872593	0.114142	5.42775
CC	GO:0030018~Z disc	14	0.00973845	0.00591844	PPP1R12B, ACTN1, FHL2, KY, MYH7, NEBL, IGFN1, SYNE2, DES, ITGB1BP2, FHOD3, RYR2, SCN5A, PARVB	909	118	18224	2.37862	0.958731	0.162297	8.27167
CC	GO:0031966~mitochondrial membrane	12	0.00834725	0.00699641	DNM3, NDUFA2, NDUFB6, HTRA2, NDUFA9, NDUFA6, SFXN3, NDUFAB1, MAPK8IP1, OGDH, NDUFS3, DNM1	909	94	18224	2.55937	0.976954	0.179987	9.70787
CC	GO:0048471~perinuclear region of cytoplasm	46	0.0319978	0.00771995	COBL, CCL2, USP2, MLPH, SLC39A13, SLC39A12, VPS52, YBX3, CALCOCO2, SLIRP, CALR, ANGEL1, AZIN2, MANF, NOCT, ANXA6, PPP1R16B, EZR, SLC2A4, TRIM68, ANP32A, PTN, VPS4A, LAMB1, DYNC1I1, BCL10, DNM3, TNIK, AIFM1, CDC20, PATJ, CLIC1, RPS6, PARK7, CDKN1A, EML1, ATP2A2, SERPINF1, ARF3, EIF4H, AKR1B1, PPP1R13B, MAPK8IP1, GBP4, MAPRE3, NPPA	909	621	18224	1.48507	0.984419	0.187862	10.6601
CC	GO:0005829~cytosol	193	0.134252	0.0110431	SCPEP1, FHIT, LDHB, S100A8, EHHADH, VPS52, PGAM2, SELENBP1, OGDH, HOOK1, APOB, CDCA8, GOT1, HTRA2, SERPINE2, HTRA1, VPS4A, CCNA1, EIF2B3, RAPGEF1, FARP1, THY1, PUDP, ADD1, ERBB4, ALDOC, GSDMC, DAG1, ACSBG2, CALR, ANGEL1, RILPL2, RPS21, NPLOC4, UPB1, EPM2A, SPHK1, GGH, CDC20, ACACB, RPS6, RGS4, RGS6, BCO1, KCNAB2, UBE2G2, QARS, MTHFD1, MCCC2, NUBP1, DYNLL1, FXN, MAPT, MCCC1, BAG2, DYNC1I1, PALD1, …	909	3315	18224	1.16722	0.997428	0.247203	14.9146
CC	GO:0001527~microfibril	4	0.00278242	0.0113669	LTBP1, FBN1, MFAP2, MFAP4	909	10	18224	8.01936	0.997843	0.243494	15.3189
CC	GO:0005916~fascia adherens	4	0.00278242	0.0113669	DES, NRAP, DSP, ACTN1	909	10	18224	8.01936	0.997843	0.243494	15.3189
CC	GO:0016020~membrane	133	0.0925153	0.0123191	KIFC1, LDHB, PDGFA, VPS52, AQP4, SELENBP1, MTHFD1L, SLC2A4, HTRA2, ST3GAL4, DNAJC7, GNG2, GNG5, DNAJC1, AUP1, CSNK1G2, HNRNPA2B1, HTR4, PNPLA4, METTL7A, LPCAT4, HLA-F, CD38, NNT, SEC61B, KCNT2, RYR2, AKAP1, ACAA1, CHMP2A, ORAI2, COBL, ACSBG2, ITGA11, DAG1, SFXN3, CALR, P3H1, RILPL2, ARPC3, EIF3F, HIST1H4F, HIST1H4C, RPL7A, SDF2, IL23R, TGFBR1, MRC2, DDX1, RPS6, VDAC1, NOTCH2, DDX55, ATP2A2, EIF4H…	909	2200	18224	1.21202	0.998714	0.251295	16.4975
CC	GO:0005777~peroxisome	12	0.00834725	0.0144748	MYO5A, PECR, ECH1, PEX19, EHHADH, MPV17L, VIM, ZADH2, SCP2, PEX10, DDO, ACAA1	909	104	18224	2.31328	0.999602	0.278368	19.1094
CC	GO:0005576~extracellular region	100	0.0695604	0.0162943	LYPD1, SPATA20, LTBP1, S100A8, PDGFA, GDF6, TGFB3, FSTL3, IL10, TGFB1, TGFB2, APOB, SERPINE2, HTRA1, PAPPA, TGFBI, SERPINE1, RGN, LOX, WFDC10B, C4A, OLFML2B, ACTN1, WFDC9, CCDC3, SERPINF1, PPBP, COL1A2, MFAP2, COL1A1, EFNA4, MFAP4, ADAMTS2, WFDC3, CCL2, ERBB4, DAG1, CNPY4, CALR, TIMP1, ITGBL1, NGRN, TEK, PCDHA10, HIST1H4F, HIST1H4C, LAMB1, EGF, FN1, OVGP1, BMP1, EFEMP1, DEFB136, NOTCH2, HEBP1, SF…	909	1610	18224	1.24524	0.999853	0.297341	21.2546
CC	GO:0005741~mitochondrial outer membrane	15	0.0104341	0.0168491	CPT1C, RAB32, CISD1, DDX3X, SPATA18, FUNDC1, TOMM40L, MAOB, CYB5A, CYB5B, ACACB, AKAP1, VDAC3, RTN4IP1, VDAC1	909	149	18224	2.0183	0.999891	0.295991	21.8982
CC	GO:0001725~stress fiber	8	0.00556483	0.0171357	MICALL2, PDLIM7, ABLIM3, TEK, ACTN1, MYH7, NEBL, MYH10	909	54	18224	2.97013	0.999907	0.290903	22.2286
CC	GO:0000788~nuclear nucleosome	7	0.00486923	0.0210906	HIST1H2BM, HIST1H2BG, HIST1H2BI, HIST1H3B, HIST3H2BB, HIST1H3F, HIST1H3I	909	44	18224	3.18952	0.999989	0.335562	26.6584
CC	GO:0009986~cell surface	39	0.0271285	0.0221623	MPZL1, PDGFA, TGFB3, ITGB5, CXCR2, PDIA4, LPAR1, GPRC5B, CALR, TGFB1, SDC2, GOT2, VCAM1, ROBO1, DEFB112, TEK, PTN, THBS1, SCN5A, CEACAM1, DEFB119, TMEM206, TGFBR1, LGALS1, SPARC, TPBG, HLA-F, NOTCH2, CD38, EGFLAM, BGN, NLGN4Y, SULF2, BACE2, SFRP4, LIPG, GPA33, F2R, SLC46A2	909	542	18224	1.4426	0.999994	0.33966	27.8176
CC	GO:0033017~sarcoplasmic reticulum membrane	6	0.00417362	0.0254462	TMEM109, SYNE2, ATP2A2, CAMK2G, RYR2, KLHL41	909	34	18224	3.53795	0.999999	0.369589	31.2645
CC	GO:0030424~axon	19	0.0132165	0.029198	CPT1C, COBL, DNM3, RAB3A, C4A, CADM2, KCNA2, MYO1D, COMT, AZIN2, ANXA3, PARK7, TGFB1, TGFB2, SEMA6A, ATAT1, ROBO1, MAPT, MYH10	909	222	18224	1.71585	1	0.401493	35.0145
CC	GO:0031091~platelet alpha granule	4	0.00278242	0.0297243	SERPINE2, SPARC, THBS1, THBS2	909	14	18224	5.72812	1	0.397324	35.525
CC	GO:0045254~pyruvate dehydrogenase complex	3	0.00208681	0.0325345	DLD, PDHA1, PDHB	909	6	18224	10.0242	1	0.416219	38.1885
CC	GO:0036464~cytoplasmic ribonucleoprotein granule	5	0.00347802	0.0336077	DYNC1I1, MAPT, RPS6, TUBA1A, RPL28	909	25	18224	4.00968	1	0.41721	39.1783
CC	GO:0005581~collagen trimer	10	0.00695604	0.0396076	COLQ, COL3A1, COL1A2, COL1A1, LOX, SERPINH1, COL5A2, PCOLCE, COL5A1, TIMP1	909	92	18224	2.17917	1	0.462086	44.4457
MF	GO:0008137~NADH dehydrogenase (ubiquinone) activity	14	0.00973845	4.50185e-07	NDUFA2, NDUFB6, NDUFA8, NDUFA9, NDUFB8, NDUFA6, NDUFB9, NDUFAB1, NDUFA10, NDUFV3, NDUFS4, NDUFS3, NDUFS2, NDUFS1	850	48	16881	5.7925	0.000461784	0.000461784	0.000713604
MF	GO:0005518~collagen binding	13	0.00904285	3.63593e-05	P3H1, PODN, PDGFA, COMP, TGFBI, MRC2, ITGA11, SPARC, SERPINH1, ABI3BP, PCOLCE, USH2A, FN1	850	60	16881	4.303	0.0366181	0.0184798	0.0576191
MF	GO:0009055~electron carrier activity	16	0.0111297	3.94093e-05	COX11, ACADSB, AIFM1, FDX1, MAOB, CYCS, IDH3B, ACADVL, SDHC, AKR1B1, ACAD9, NDUFS3, NDUFS2, NDUFS1, GLRX, ETFA	850	90	16881	3.53067	0.0396282	0.0133878	0.062451
MF	GO:0005201~extracellular matrix structural constituent	13	0.00904285	0.000112766	COL4A2, PXDN, FBN1, COL3A1, MGP, COL5A2, COL5A1, BGN, COMP, COL1A2, VCAN, COL1A1, LAMB1	850	67	16881	3.85343	0.109262	0.0285118	0.178601
MF	GO:0051287~NAD binding	9	0.00626043	0.000503899	LDHB, ME3, NNT, IDH3G, DLD, IDH3B, GLYR1, NDUFS2, HIBADH	850	38	16881	4.70368	0.403771	0.0982574	0.795769
MF	GO:0016651~oxidoreductase activity, acting on NAD(P)H	5	0.00347802	0.00157765	NDUFS4, AIFM1, DECR1, NDUFS2, NDUFS1	850	11	16881	9.02727	0.802092	0.236614	2.47172
MF	GO:0048407~platelet-derived growth factor binding	5	0.00347802	0.00157765	PDGFA, COL3A1, COL1A2, COL1A1, COL5A1	850	11	16881	9.02727	0.802092	0.236614	2.47172
MF	GO:0005515~protein binding	484	0.336672	0.00203816	PDP1, LDHB, FHIT, RP1, LTBP1, LTBP2, C16ORF72, EHHADH, LDHD, VPS52, USE1, FSTL3, SELENBP1, RORB, CCDC141, INTS9, CDCA8, FLI1, SERPINE2, HIST1H2BI, SERPINE1, VPS4A, CCNA1, GNG5, AUP1, TNIK, AIG1, RXRG, MYH7, TOX4, THY1, WFDC9, TAGLN, SERPINF1, SPAG4, ROR1, RYR2, ACAA1, SH3GL1, ORAI2, ERBB4, NIFK, CACNB2, ACP1, KCNJ3, ARIH2, DUSP14, WDR59, NPLOC4, IL23R, TGFBR1, SPHK1, ESRRG, ACACB, RPS6, VDAC1, SY…	850	8785	16881	1.09417	0.876719	0.258471	3.18233
MF	GO:0005516~calmodulin binding	20	0.0139121	0.00318639	MYO5A, AEBP1, CAMK2G, SPHK1, MYO1D, IQGAP3, MAPKAPK3, MYH7, ENKUR, PDE1C, RGS4, SNTB2, RYR2, IQCG, MARCKS, CNN1, SCN5A, CAMK1D, MYH10, ADD1	850	189	16881	2.10159	0.962163	0.33589	4.9331
MF	GO:0005114~type II transforming growth factor beta receptor binding	4	0.00278242	0.0038092	TGFBR1, TGFB3, TGFB1, TGFB2	850	7	16881	11.3486	0.980073	0.352786	5.87029
MF	GO:0031005~filamin binding	5	0.00347802	0.00424064	MICALL2, DPYSL4, DPYSL3, CEACAM1, NEBL	850	14	16881	7.09286	0.987223	0.353392	6.51441
MF	GO:0008083~growth factor activity	17	0.0118253	0.00765049	BMP1, PDGFA, GDF6, EFEMP1, TGFB3, FGF12, IL10, TGFB1, MANF, TIMP1, TGFB2, TDGF1P3, PPBP, GDF10, PTN, EGF, BMP8A	850	162	16881	2.08407	0.999622	0.511456	11.4619
MF	GO:0016740~transferase activity	12	0.00834725	0.00872247	CPT1C, MGST3, DLST, ART3, CD38, BST1, XYLT1, CHST15, PTDSS1, GSTP1, PDSS2, GLRX	850	96	16881	2.4825	0.999875	0.527181	12.9659
MF	GO:0051536~iron-sulfur cluster binding	5	0.00347802	0.0110454	ISCU, FXN, NUBP1, NFS1, NDUFS1	850	18	16881	5.51667	0.999989	0.5838	16.1432
MF	GO:0003779~actin binding	24	0.0166945	0.0134028	MYO5A, WASF3, MLPH, MICAL2, ABLIM3, ENC1, DAG1, MYH7, TPM2, MSRB2, HOOK1, TNNT2, SYNE2, EZR, TAGLN, NRAP, FHOD3, SNTB2, CNN1, AFAP1, PARVB, CEACAM1, ADD1, MYH10	850	278	16881	1.71453	0.999999	0.628006	19.2563
MF	GO:0003824~catalytic activity	18	0.0125209	0.0140604	BCAT1, FHIT, ECI2, SPATA20, ECH1, GMPR2, EHHADH, NFS1, ACSBG2, TXLNB, AZIN2, ACSF2, ALAS1, SULF2, CDYL2, PITRM1, PIGC, PHYKPL	850	188	16881	1.90149	1	0.620368	20.1051
MF	GO:0004591~oxoglutarate dehydrogenase (succinyl-transferring) activity	3	0.00208681	0.0141643	MRPS36, OGDHL, OGDH	850	4	16881	14.895	1	0.599394	20.2384
MF	GO:0034714~type III transforming growth factor beta receptor binding	3	0.00208681	0.0141643	TGFB3, TGFB1, TGFB2	850	4	16881	14.895	1	0.599394	20.2384
MF	GO:0051015~actin filament binding	14	0.00973845	0.0156071	MICALL2, EZR, SYNE2, ARPC3, LASP1, MYO1D, CACNB2, ACTN1, MARCKS, TPM2, ABL2, ADD1, MYH10, NEBL	850	132	16881	2.10636	1	0.613012	22.0689
MF	GO:0000062~fatty-acyl-CoA binding	6	0.00417362	0.0159062	ACADVL, ECI2, ACADSB, ACAD9, SCP2, ETFA	850	30	16881	3.972	1	0.599058	22.4433
MF	GO:0030234~enzyme regulator activity	5	0.00347802	0.0161508	PSMD2, RGN, DPM2, COX6A1, CPN2	850	20	16881	4.965	1	0.58491	22.7484
MF	GO:0016787~hydrolase activity	18	0.0125209	0.0162192	FHIT, NUDT17, NCEH1, NUDT13, HINT2, ACMSD, PGAM2, ABHD1, HDAC11, GDPGP1, CMBL, MTHFD1, PRDX6, PUDP, MPPED2, LACTB, MRPL46, INPP5A	850	191	16881	1.87162	1	0.567799	22.8335
MF	GO:0005178~integrin binding	12	0.00834725	0.0164491	VCAM1, COL3A1, TGFBI, ITGB1BP2, FBN1, ACTN1, CALR, THBS1, MMP14, COL5A1, FN1, THY1	850	105	16881	2.26971	1	0.555293	23.1189
MF	GO:0016641~oxidoreductase activity, acting on the CH-NH2 group of donors, oxygen as acceptor	3	0.00208681	0.0228241	LOX, LOXL3, LOXL1	850	5	16881	11.916	1	0.659306	30.6488
MF	GO:0030170~pyridoxal phosphate binding	8	0.00556483	0.0235486	GOT2, BCAT1, ETNPPL, ALAS1, GOT1, PYGM, NFS1, PHYKPL	850	57	16881	2.78737	1	0.654595	31.4594
MF	GO:0008201~heparin binding	15	0.0104341	0.0311056	APOB, CCL2, SERPINE2, LTBP2, COMP, FBN1, LIPG, PTN, FGF12, THBS1, THBS2, ABI3BP, COL5A1, PCOLCE, FN1	850	160	16881	1.86187	1	0.74099	39.4014
MF	GO:0015288~porin activity	3	0.00208681	0.0331057	TOMM40L, VDAC3, VDAC1	850	6	16881	9.93	1	0.748838	41.3542
MF	GO:0051537~2 iron, 2 sulfur cluster binding	5	0.00347802	0.03461	ISCU, CISD1, FXN, FDX1, NDUFS1	850	25	16881	3.972	1	0.750914	42.784
MF	GO:0052890~oxidoreductase activity, acting on the CH-CH group of donors, with a flavin as acceptor	4	0.00278242	0.0366717	ACADVL, ACADSB, ACAD9, ETFA	850	15	16881	5.296	1	0.758218	44.6905
MF	GO:0050840~extracellular matrix binding	5	0.00347802	0.0393281	BGN, OLFML2B, TGFBI, SPARC, THBS1	850	26	16881	3.81923	1	0.77012	47.0592
MF	GO:0050660~flavin adenine dinucleotide binding	8	0.00556483	0.041065	ACADVL, ACADSB, AIFM1, DLD, LDHD, MAOB, ACAD9, ETFA	850	64	16881	2.4825	1	0.773163	48.5562
MF	GO:0003995~acyl-CoA dehydrogenase activity	4	0.00278242	0.0434923	ACADVL, ACADSB, ACAD9, ETFA	850	16	16881	4.965	1	0.781453	50.582
MF	GO:0016810~hydrolase activity, acting on carbon-nitrogen (but not peptide) bonds	4	0.00278242	0.0434923	UPB1, NADSYN1, DPYSL4, DPYSL3	850	16	16881	4.965	1	0.781453	50.582
MF	GO:0048037~cofactor binding	4	0.00278242	0.0434923	TYMS, ME3, PGAM2, DDO	850	16	16881	4.965	1	0.781453	50.582
MF	GO:0050431~transforming growth factor beta binding	4	0.00278242	0.0434923	LTBP1, TGFBR1, TGFB3, THBS1	850	16	16881	4.965	1	0.781453	50.582
MF	GO:0016491~oxidoreductase activity	17	0.0118253	0.0453095	RNLS, SUOX, PTGR2, GMPR2, ADHFE1, AIFM1, MICAL2, MAOB, DHRS11, COQ6, DHRS1, ALDH1A3, AKR1B1, ZADH2, BDH1, RTN4IP1, ETFA	850	200	16881	1.6881	1	0.784465	52.0494

## Sheet: KEGG
ID	Term	Count	%	PValue	Genes	List Total	Pop Hits	Pop Total	Fold Enrichment	Bonferroni	Benjamini	FDR
hsa01200	Carbon metabolism	26	0.0180857	5.37624e-09	ME3/EHHADH/ALDOC/OGDHL/ECHS1/PGAM2/OGDH/ACAT1/PDHB/GOT2/IDH3G/GOT1/MCEE/RGN/PDHA1/DLST/ACO2/CS/IDH3B/PFKM/G6PD/SDHC/DLD/PCCB/MDH2/PRPS2	406	113	6879	3.89847	1.46771e-06	1.46771e-06	7.08088e-06
hsa01100	Metabolic pathways	116	0.08069	3.07947e-08	LDHB/EHHADH/NDUFAB1/PGAM2/OGDH/PDHB/HIBADH/MTHFD1L/CMBL/GOT2/GOT1/IDH3G/ST3GAL5/ST3GAL4/RGN/PDHA1/BST1/LPCAT4/CD38/PYCR1/NNT/DLD/PCCB/PRPS2/MDH2/ACAA1/ACADSB/ME3/ALDOC/ACSBG2/ACAT1/B4GALT6/UPB1/MAOB/SPHK1/ACMSD/IDH3B/ACACB/NDUFV3/GGT5/HMGCS2/PLCG2/COX6A1/BCO1/PHYKPL/UQCRC2/ETNPPL/COX11/COX10/OGDHL/ACOT2/QARS/MTHFD1/MCCC2/ALAS1/NDUFS4/PLCB4/XYLT1/MCEE/MCCC1/PIGC/AGPAT4/PTDSS1/NDUFS3/NDUFS2/NDUFS1/…	406	1219	6879	1.61233	8.40693e-06	4.20347e-06	4.05588e-05
hsa00020	Citrate cycle (TCA cycle)	12	0.00834725	5.08144e-07	DLST/IDH3G/ACO2/SDHC/DLD/OGDHL/CS/IDH3B/PDHA1/OGDH/MDH2/PDHB	406	30	6879	6.77734	0.000138714	4.62401e-05	0.00066926
hsa01130	Biosynthesis of antibiotics	33	0.0229549	6.34028e-07	BCAT1/LDHB/EHHADH/ALDOC/OGDHL/PGAM2/ECHS1/OGDH/ACAT1/PDHB/CMBL/GOT2/GOT1/IDH3G/ATIC/RGN/PDHA1/NSDHL/DLST/ACO2/CS/IDH3B/PFKM/PYCR1/G6PD/HMGCS2/SDHC/DLD/PCYOX1/PCCB/MDH2/PRPS2/ACAA1	406	212	6879	2.63741	0.000173075	4.32715e-05	0.000835056
hsa00280	Valine, leucine and isoleucine degradation	14	0.00973845	1.88701e-06	BCAT1/ACADSB/EHHADH/ECHS1/ACAT1/HIBADH/MCCC2/HMGCS2/MCCC1/MCEE/DLD/AACS/PCCB/ACAA1	406	47	6879	5.04696	0.000515022	0.000103026	0.0024853
hsa05012	Parkinson's disease	25	0.0173901	2.21784e-06	UQCRC2/NDUFA2/NDUFB6/SNCAIP/NDUFA8/NDUFB8/NDUFA9/NDUFB9/NDUFA6/UBE2G2/CYCS/NDUFAB1/COX4I1/NDUFA10/VDAC3/PARK7/VDAC1/NDUFV3/NDUFS4/HTRA2/SDHC/COX6A1/NDUFS3/NDUFS2/NDUFS1	406	142	6879	2.98298	0.000605289	0.000100907	0.00292102
hsa04932	Non-alcoholic fatty liver disease (NAFLD)	25	0.0173901	6.73138e-06	UQCRC2/NDUFB6/NDUFB8/NDUFB9/NDUFAB1/TGFB1/NDUFS4/CASP7/PIK3R3/NDUFS3/NDUFS2/NDUFS1/AKT2/NDUFA2/NDUFA8/NDUFA9/SOCS3/NDUFA6/CYCS/COX4I1/NDUFA10/NDUFV3/SDHC/COX6A1/IKBKB	406	151	6879	2.80519	0.00183599	0.00026249	0.00886534
hsa05010	Alzheimer's disease	24	0.0166945	0.000118319	UQCRC2/NDUFA2/NDUFB6/NDUFA8/NDUFA9/NDUFB8/NDUFA6/NDUFB9/CYCS/NDUFAB1/COX4I1/NDUFA10/NDUFV3/NDUFS4/PLCB4/ATP2A2/CASP7/BACE2/SDHC/MAPT/COX6A1/NDUFS3/NDUFS2/NDUFS1	406	168	6879	2.42048	0.0317869	0.00402974	0.155722
hsa00190	Oxidative phosphorylation	20	0.0139121	0.000263831	UQCRC2/NDUFA2/COX11/NDUFB6/NDUFA8/COX10/NDUFA9/NDUFB8/NDUFA6/NDUFB9/NDUFAB1/COX4I1/NDUFA10/NDUFV3/NDUFS4/SDHC/COX6A1/NDUFS3/NDUFS2/NDUFS1	406	133	6879	2.54787	0.0695021	0.00797199	0.346927
hsa01210	2-Oxocarboxylic acid metabolism	7	0.00486923	0.000284684	GOT2/BCAT1/GOT1/IDH3G/ACO2/CS/IDH3B	406	17	6879	6.97667	0.0747857	0.00774286	0.3743
hsa04512	ECM-receptor interaction	15	0.0104341	0.000498608	COL4A2/TNC/COL3A1/DAG1/ITGA11/ITGB5/COL5A2/COL5A1/COMP/COL1A2/COL1A1/THBS1/LAMB1/THBS2/FN1	406	87	6879	2.92127	0.127292	0.0123014	0.654713
hsa05410	Hypertrophic cardiomyopathy (HCM)	14	0.00973845	0.000556374	MYL2/DAG1/TGFB3/ITGA11/CACNB1/CACNB2/ITGB5/CACNA2D3/TPM2/TGFB1/TGFB2/TNNT2/DES/RYR2	406	78	6879	3.04111	0.140954	0.0125812	0.730308
hsa01230	Biosynthesis of amino acids	13	0.00904285	0.000901355	BCAT1/ALDH18A1/ACO2/ALDOC/CS/IDH3B/PGAM2/PFKM/GOT2/PYCR1/GOT1/IDH3G/PRPS2	406	72	6879	3.05922	0.218219	0.0187588	1.18066
hsa05414	Dilated cardiomyopathy	14	0.00973845	0.00114492	MYL2/DAG1/TGFB3/ITGA11/CACNB1/CACNB2/ITGB5/CACNA2D3/TPM2/TGFB1/TGFB2/TNNT2/DES/RYR2	406	84	6879	2.82389	0.268562	0.0220911	1.49748
hsa05016	Huntington's disease	23	0.0159989	0.00194149	UQCRC2/NDUFA2/NDUFB6/NDUFA8/DNAH14/NDUFA9/NDUFB8/NDUFA6/NDUFB9/CYCS/NDUFAB1/COX4I1/NDUFA10/VDAC3/VDAC1/NDUFV3/NDUFS4/PLCB4/SDHC/COX6A1/NDUFS3/NDUFS2/NDUFS1	406	192	6879	2.02967	0.411715	0.0347514	2.52709
hsa05144	Malaria	10	0.00695604	0.00194572	VCAM1/CCL2/COMP/TGFB3/THBS1/THBS2/IL10/TGFB1/SDC2/TGFB2	406	49	6879	3.45783	0.412395	0.0326852	2.53253
hsa00620	Pyruvate metabolism	9	0.00626043	0.00195596	LDHB/ME3/DLD/LDHD/PDHA1/ACACB/ACAT1/MDH2/PDHB	406	40	6879	3.81225	0.414038	0.0309521	2.5457
hsa04510	Focal adhesion	24	0.0166945	0.00217674	COL4A2/MYL2/PDGFA/TNC/PPP1R12B/COL3A1/ITGA11/ITGB5/ACTN1/COL5A2/COL5A1/COMP/COL1A2/SHC1/COL1A1/THBS1/LAMB1/PIK3R3/EGF/THBS2/RAPGEF1/PARVB/FN1/AKT2	406	206	6879	1.97398	0.44838	0.0325096	2.82924
hsa00071	Fatty acid degradation	9	0.00626043	0.00270773	CPT1C/ACADVL/ECI2/ACADSB/EHHADH/ACSBG2/ECHS1/ACAT1/ACAA1	406	42	6879	3.63072	0.522988	0.0382095	3.5081
hsa05146	Amoebiasis	15	0.0104341	0.00351354	COL4A2/COL3A1/TGFB3/ACTN1/COL5A2/IL10/TGFB1/COL5A1/TGFB2/PLCB4/COL1A2/COL1A1/LAMB1/PIK3R3/FN1	406	106	6879	2.39764	0.617446	0.0469084	4.52992
hsa05034	Alcoholism	21	0.0146077	0.00360925	HIST1H2AB/HIST1H2AC/GNAO1/ADORA2B/HIST1H2BG/HIST1H2AE/MAOB/HDAC11/HIST1H2BM/GNB1/HIST2H2AC/HIST1H2BI/HIST1H3B/HIST1H4F/GNG2/HIST1H4C/SHC1/HIST3H2BB/HIST1H3F/GNG5/HIST1H3I	406	177	6879	2.01023	0.627347	0.0459175	4.65062
hsa04066	HIF-1 signaling pathway	14	0.00973845	0.00389037	CAMK2G/RPS6/PDHB/TIMP1/RBX1/CDKN1A/PLCG2/SERPINE1/TEK/PDHA1/PIK3R3/EGF/NPPA/AKT2	406	96	6879	2.47091	0.654976	0.0472189	5.00433
hsa00630	Glyoxylate and dicarboxylate metabolism	7	0.00486923	0.00412223	ACO2/MCEE/DLD/CS/ACAT1/PCCB/MDH2	406	27	6879	4.39272	0.676221	0.0478477	5.29514
hsa00650	Butanoate metabolism	7	0.00486923	0.00412223	HMGCS2/ALDH5A1/EHHADH/ECHS1/AACS/BDH1/ACAT1	406	27	6879	4.39272	0.676221	0.0478477	5.29514
hsa00640	Propanoate metabolism	7	0.00486923	0.00499135	LDHB/EHHADH/MCEE/ECHS1/ACACB/ACAT1/PCCB	406	28	6879	4.23584	0.744888	0.0553293	6.37795
hsa01212	Fatty acid metabolism	9	0.00626043	0.00635948	CPT1C/ACADVL/PECR/ACADSB/EHHADH/ACSBG2/ECHS1/ACAT1/ACAA1	406	48	6879	3.17688	0.824775	0.0672959	8.05929
hsa05142	Chagas disease (American trypanosomiasis)	14	0.00973845	0.00770456	CFLAR/GNAO1/CCL2/TGFBR1/TGFB3/CALR/TGFB1/IL10/TGFB2/PLCB4/SERPINE1/PIK3R3/IKBKB/AKT2	406	104	6879	2.28084	0.878942	0.078001	9.68507
hsa00380	Tryptophan metabolism	8	0.00556483	0.00800407	CYP1B1/EHHADH/OGDHL/MAOB/ACMSD/ECHS1/OGDH/ACAT1	406	40	6879	3.38867	0.888519	0.078042	10.0434
hsa00310	Lysine degradation	9	0.00626043	0.010335	DLST/PLOD1/EHHADH/OGDHL/ECHS1/OGDH/ACAT1/COLGALT1/PHYKPL	406	52	6879	2.9325	0.941348	0.0963294	12.7879
hsa05322	Systemic lupus erythematosus	16	0.0111297	0.0119186	HIST1H2AB/HIST1H2AC/C4A/HIST1H2BG/HIST1H2AE/ACTN1/IL10/HIST1H2BM/HIST1H2BI/HIST2H2AC/HIST1H3B/HIST1H4F/HIST1H4C/HIST3H2BB/HIST1H3F/HIST1H3I	406	134	6879	2.02309	0.96212	0.106736	14.6081
hsa04260	Cardiac muscle contraction	11	0.00765164	0.0119464	UQCRC2/TNNT2/MYL2/CACNB1/CACNB2/COX4I1/COX6A1/RYR2/MYH7/TPM2/CACNA2D3	406	75	6879	2.48502	0.962409	0.103598	14.6397
hsa05412	Arrhythmogenic right ventricular cardiomyopathy (ARVC)	10	0.00695604	0.0159407	DES/PKP2/DAG1/CACNB1/ITGA11/CACNB2/ITGB5/DSP/RYR2/CACNA2D3	406	67	6879	2.52886	0.98756	0.131955	19.0745
hsa04151	PI3K-Akt signaling pathway	31	0.0215637	0.0197079	PHLPP1/PDGFA/TNC/COL3A1/ITGA11/ITGB5/LPAR1/FGF12/COMP/TEK/GNG2/EGF/THBS1/LAMB1/PIK3R3/GNG5/THBS2/AKT2/FN1/COL4A2/RPS6/COL5A2/COL5A1/CDKN1A/GNB1/COL1A2/COL1A1/JAK3/EFNA4/IKBKB/F2R	406	345	6879	1.52245	0.995634	0.156177	23.0611
hsa04146	Peroxisome	11	0.00765164	0.0231516	ECI2/PECR/ECH1/PEX19/EHHADH/MPV17L/PXMP2/SCP2/PEX10/DDO/ACAA1	406	83	6879	2.2455	0.99833	0.17616	26.5458
hsa00130	Ubiquinone and other terpenoid-quinone biosynthesis	4	0.00278242	0.0234493	COQ2/VKORC1/NQO1/COQ6	406	11	6879	6.16122	0.998463	0.173476	26.8401
hsa05220	Chronic myeloid leukemia	10	0.00695604	0.0245495	CDKN1A/TGFBR1/TGFB3/SHC1/RUNX1/IKBKB/PIK3R3/TGFB1/AKT2/TGFB2	406	72	6879	2.35324	0.99887	0.176239	27.9182
hsa04350	TGF-beta signaling pathway	11	0.00765164	0.0249565	LTBP1/GDF6/TGFBR1/TGFB3/ID4/BMPR1B/THBS1/TGFB1/TGFB2/BMP8A/RBX1	406	84	6879	2.21877	0.998992	0.174409	28.3134
hsa00330	Arginine and proline metabolism	8	0.00556483	0.0259506	GOT2/PYCR1/GOT1/ALDH18A1/CKM/CKMT2/MAOB/AZIN2	406	50	6879	2.71094	0.999237	0.176343	29.27
hsa05230	Central carbon metabolism in cancer	9	0.00626043	0.0330484	SLC1A5/G6PD/PGAM2/PDHA1/PFKM/PIK3R3/PDHB/AKT2/SIRT3	406	64	6879	2.38266	0.999896	0.214503	35.7652
hsa04020	Calcium signaling pathway	18	0.0125209	0.0340271	ORAI2/ADORA2B/ERBB4/CAMK2G/SPHK1/HTR4/PTGFR/VDAC3/VDAC1/CD38/PLCB4/ATP2A2/P2RX1/PDE1C/P2RX3/PLCG2/RYR2/F2R	406	179	6879	1.7038	0.999921	0.215208	36.6163
hsa00900	Terpenoid backbone biosynthesis	5	0.00347802	0.037234	HMGCS2/NUS1/PCYOX1/ACAT1/PDSS2	406	22	6879	3.85076	0.999968	0.228157	39.3324
