# Supplementary material for: Potential Molecular Mechanism of the NPPB Gene in Postischemic Heart Failure with and without T2DM
Source: Biomed Res Int. 2020 Aug 3;2020:2159460. doi: 10.1155/2020/2159460 (PMC7424400; doi:10.1155/2020/2159460)
Supplement: Supplementary 6 — Table S2: the GO and KEGG pathway in nDHF patients. [file 2159460.f6.xlsx]

## Sheet: GO
Category	Term	Count	%	PValue	Genes	List Total	Pop Hits	Pop Total	Fold Enrichment	Bonferroni	Benjamini	FDR
BP	GO:0006099~tricarboxylic acid cycle	11	0.00707118	1.18275e-06	SDHA, ACO2, SDHC, CS, IDH2, DLAT, DHTKD1, SUCLA2, IDH3A, PDHB, FH	880	29	16792	7.23793	0.00387661	0.00387661	0.00215117
BP	GO:0045669~positive regulation of osteoblast differentiation	12	0.00771402	0.000246362	MSX2, IL6, PDLIM7, IFITM1, FAM20C, IGF1, ID4, CLIC1, FBN2, TMEM119, RUNX2, BMP6	880	60	16792	3.81636	0.554765	0.332741	0.447138
BP	GO:0001525~angiogenesis	24	0.015428	0.0014976	KLF5, COL18A1, FGF18, CCL2, PTGS2, AIMP1, MYDGF, IL18, ECM1, TGFB2, TSPAN12, SHB, GPI, ARHGAP22, PKNOX1, APOD, FAP, SERPINE1, PLCD3, AAMP, RAPGEF3, COL8A1, CEACAM1, SCG2	880	223	16792	2.05365	0.992714	0.806136	2.68907
BP	GO:0042407~cristae formation	5	0.00321417	0.00263217	LETM1, SAMM50, IMMT, AFG3L2, OMA1	880	12	16792	7.95076	0.999826	0.885119	4.68064
BP	GO:0001503~ossification	12	0.00771402	0.00291363	PDLIM7, IFITM1, BCL2, FSTL3, MGP, FOXC2, STC1, RUNX1, TMEM119, RUNX2, ECM1, BMP8A	880	80	16792	2.86227	0.999931	0.852874	5.16871
BP	GO:0001649~osteoblast differentiation	14	0.00899969	0.00300967	TNC, LEF1, FHL2, GLI2, JUNB, MSX2, RRAS2, VCAN, TMEM119, GPNMB, RUNX2, IGFBP3, WWOX, BMP6	880	104	16792	2.56871	0.99995	0.807907	5.3347
BP	GO:0009611~response to wounding	10	0.00642835	0.00527609	ZFP36, F2RL2, SLC1A2, SLC1A3, CCL2, AIMP1, TNC, PAX6, ID3, TGFB2	880	63	16792	3.02886	1	0.916407	9.17322
BP	GO:0006479~protein methylation	6	0.00385701	0.0059418	PRMT7, BTG1, PRMT8, PCMTD2, PCMT1, N6AMT1	880	23	16792	4.97787	1	0.913394	10.2724
BP	GO:0072321~chaperone-mediated protein transport	4	0.00257134	0.006565	PEX19, TOR1A, TIMM9, CLIP3	880	8	16792	9.54091	1	0.909589	11.2901
BP	GO:0009060~aerobic respiration	7	0.00449984	0.00665272	OXA1L, COX10, SDHC, COX20, COX6A1, PMPCB, UQCRB	880	33	16792	4.04766	1	0.888313	11.4325
BP	GO:0008152~metabolic process	18	0.011571	0.00705653	ACAA2, ECH1, ACO2, CNDP2, BCKDHB, ARSJ, ISOC1, ACSS2, ACAT1, LPCAT4, FAHD1, ACSS1, SULF1, PRNP, SUCLA2, PDHX, AGPAT3, ENOSF1	880	168	16792	2.04448	1	0.879266	12.085
BP	GO:0006635~fatty acid beta-oxidation	8	0.00514268	0.00739581	CPT1C, ACAA2, ECH1, ACADS, DECR1, HADH, ACAT1, HADHA	880	44	16792	3.46942	1	0.868862	12.6298
BP	GO:0006006~glucose metabolic process	10	0.00642835	0.00792145	PDK1, GNPDA1, AIMP1, APOD, ALDH5A1, PGM1, DLAT, PDHB, OMA1, SERP1	880	67	16792	2.84803	1	0.865884	13.4675
BP	GO:1903830~magnesium ion transmembrane transport	5	0.00321417	0.00818676	CNNM4, SLC41A2, NIPAL3, SLC41A1, NIPA1	880	16	16792	5.96307	1	0.854603	13.8874
BP	GO:0035994~response to muscle stretch	5	0.00321417	0.00818676	GPI, EDN1, RAF1, RYR2, NPPA	880	16	16792	5.96307	1	0.854603	13.8874
BP	GO:0043066~negative regulation of apoptotic process	37	0.0237849	0.00902103	IER3, PRKCZ, MYDGF, FHL2, AQP1, GLI2, TIMP1, MSX2, PRAMEF2, BCL2, AATF, RARB, PALB2, NQO1, IL6, EGR3, SOCS3, SMAD6, IGF1, LEF1, RAF1, PDE3A, PTGFR, PLAUR, PLAC8, CD38, AMIGO2, MAD2L1, PSMG2, HDAC1, PSEN2, ARAF, HSPB1, PRNP, HTR2B, IL2, ARHGAP10	880	455	16792	1.55171	1	0.862477	15.1954
BP	GO:0002024~diet induced thermogenesis	4	0.00257134	0.00946737	ADRB2, ADRB1, OMA1, BMP8A	880	9	16792	8.48081	1	0.858072	15.8874
BP	GO:0007202~activation of phospholipase C activity	6	0.00385701	0.010204	C5AR1, ADCYAP1R1, AVPR1A, ADRA1A, HTR2B, SELE	880	26	16792	4.4035	1	0.862111	17.0179
BP	GO:0046487~glyoxylate metabolic process	6	0.00385701	0.010204	BCKDHB, DLAT, DHTKD1, PDHX, DDO, PDHB	880	26	16792	4.4035	1	0.862111	17.0179
BP	GO:0019722~calcium-mediated signaling	8	0.00514268	0.0163157	AGTR1, CXCR4, EDN1, AVPR1A, RYR2, HTR2B, RCAN3, SELE	880	51	16792	2.99323	1	0.950275	25.8588
BP	GO:0006418~tRNA aminoacylation for protein translation	7	0.00449984	0.016929	AIMP1, HARS2, HARS, WARS2, CARS2, MRPL39, SARS2	880	40	16792	3.33932	1	0.947717	26.6951
BP	GO:0045766~positive regulation of angiogenesis	13	0.00835685	0.017233	CCL24, C5AR1, BTG1, MYDGF, CCBE1, SERPINE1, HSPB1, CHRNA7, RAPGEF3, AQP1, RUNX1, ECM1, ANXA3	880	115	16792	2.15708	1	0.942405	27.1063
BP	GO:0042493~response to drug	26	0.0167137	0.0172863	PTGS2, ADCYAP1R1, SRP68, AQP1, HADHA, TGFB2, SLC1A2, SLC1A3, APOD, BCHE, BCL2, DHODH, HADH, APEX1, COL18A1, IL6, MAOB, ATP1A3, PDE3A, JUNB, CD38, HDAC1, ADRA1A, HTR2B, IGFBP2, NNMT	880	304	16792	1.632	1	0.934577	27.1781
BP	GO:0030509~BMP signaling pathway	10	0.00642835	0.017441	MEGF8, SMAD9, SMAD7, SMAD6, MAPK3, LEF1, RYR2, RUNX2, BMP8A, BMP6	880	76	16792	2.51077	1	0.927664	27.3864
BP	GO:0055114~oxidation-reduction process	44	0.0282847	0.0187703	TYRP1, SC5D, OXA1L, GLRX5, ALDH1L1, PTGS2, KCNAB2, GLUD2, TMX4, PYROXD1, LDHD, PRDX4, VCAM1, GPD1L, CYB561D2, FMO5, CBR1, CPOX, GSTK1, DHODH, NQO1, APEX1, WWOX, NOX4, RNLS, MTHFD2L, CYP11A1, FOXRED2, BCKDHB, MAOB, QDPR, CYB5RL, COQ7, DDO, SDHA, ALDH7A1, HSDL2, L2HGDH, SDHC, FOXRED1, PCYOX1, BCO2, RDH13, UQCRB	880	592	16792	1.41824	1	0.933166	29.1525
BP	GO:0051384~response to glucocorticoid	9	0.00578551	0.0196654	IL6, PTGS2, BCHE, PAPPA, BCL2, IGFBP2, TRIM63, ANXA3, BMP6	880	65	16792	2.6421	1	0.933973	30.3188
BP	GO:0006091~generation of precursor metabolites and energy	8	0.00514268	0.0198648	GNPDA1, SLC25A4, ACO2, PHKA1, AVPR1A, COX6A1, AQP7, DHTKD1	880	53	16792	2.88027	1	0.928331	30.5761
BP	GO:0005975~carbohydrate metabolic process	17	0.0109282	0.0204393	MGAT4B, GNPDA1, GLB1L, CS, IDH3A, GPD1L, MAN2A2, SIAE, GPI, SLC2A5, PYGM, SLC2A4, CHST6, POMT1, PGM1, IDH2, ALDH2	880	174	16792	1.86432	1	0.926347	31.3126
BP	GO:0007205~protein kinase C-activating G-protein coupled receptor signaling pathway	6	0.00385701	0.0212674	EDN1, DGKI, PLPP1, HTR2B, GRM1, IL2	880	31	16792	3.69326	1	0.926807	32.361
BP	GO:0005980~glycogen catabolic process	5	0.00321417	0.0218828	PYGM, PGM1, PHKA1, PFKM, AGL	880	21	16792	4.54329	1	0.925357	33.1305
BP	GO:0010510~regulation of acetyl-CoA biosynthetic process from pyruvate	4	0.00257134	0.0220486	PDK1, DLAT, PDHX, PDHB	880	12	16792	6.36061	1	0.919922	33.3363
BP	GO:0006069~ethanol oxidation	4	0.00257134	0.0220486	ACSS1, ADH5, ALDH2, ACSS2	880	12	16792	6.36061	1	0.919922	33.3363
BP	GO:0010717~regulation of epithelial to mesenchymal transition	4	0.00257134	0.0220486	SMAD7, CLASP1, CLASP2, EPHA3	880	12	16792	6.36061	1	0.919922	33.3363
BP	GO:0019725~cellular homeostasis	4	0.00257134	0.0220486	CCL2, RHOT1, RHOT2, AQP1	880	12	16792	6.36061	1	0.919922	33.3363
BP	GO:0031000~response to caffeine	4	0.00257134	0.0220486	IL6, HDAC1, DHODH, RYR2	880	12	16792	6.36061	1	0.919922	33.3363
BP	GO:0050873~brown fat cell differentiation	6	0.00385701	0.0241521	ADRB2, ADRB1, RGS2, PTGS2, SLC2A4, PLAC8	880	32	16792	3.57784	1	0.931183	35.8966
BP	GO:0015693~magnesium ion transport	4	0.00257134	0.0275695	CNNM4, NIPAL3, SLC41A1, NIPA1	880	13	16792	5.87133	1	0.948264	39.859
BP	GO:0051966~regulation of synaptic transmission, glutamatergic	5	0.00321417	0.0298192	DKK1, SERPINE2, CNR1, DGKI, GRM1	880	23	16792	4.14822	1	0.955254	42.3399
BP	GO:0030307~positive regulation of cell growth	10	0.00642835	0.0312627	CD38, BCL2, CXCL16, AVPR1A, AKAP6, LEF1, LGI1, N6AMT1, TGFB2, IL2	880	84	16792	2.27165	1	0.957607	43.8805
BP	GO:0070125~mitochondrial translational elongation	10	0.00642835	0.0334082	MRPS27, MRPS17, TSFM, MRPS25, MRPL49, MRPL47, MRPL39, MRPL30, MRPL46, MRPS31	880	85	16792	2.24492	1	0.962446	46.0986
BP	GO:0009612~response to mechanical stimulus	8	0.00514268	0.0336618	INHBB, CCL2, TNC, IGFBP2, GLI2, PSPH, PIEZO2, JUNB	880	59	16792	2.58737	1	0.959757	46.3553
BP	GO:0051216~cartilage development	8	0.00514268	0.0336618	SMAD9, LUM, MAPK3, EDN1, SULF1, BMP8A, TIMP1, BMP6	880	59	16792	2.58737	1	0.959757	46.3553
BP	GO:0006744~ubiquinone biosynthetic process	4	0.00257134	0.0337535	COQ8B, COQ8A, COQ9, COQ7	880	14	16792	5.45195	1	0.95638	46.4477
BP	GO:0030501~positive regulation of bone mineralization	6	0.00385701	0.0342681	ADRB2, OSR2, FAM20C, FBN2, TMEM119, BMP6	880	35	16792	3.27117	1	0.954719	46.9641
BP	GO:0001822~kidney development	10	0.00642835	0.0356533	AGTR1, IFT20, PTCD2, SIX1, SULF1, FSTL3, CA2, GLI2, TGFB2, BMP6	880	86	16792	2.21882	1	0.956607	48.3307
BP	GO:0019800~peptide cross-linking via chondroitin 4-sulfate glycosaminoglycan	3	0.0019285	0.0356654	EGFLAM, BGN, SPOCK2	880	6	16792	9.54091	1	0.953022	48.3425
BP	GO:0071799~cellular response to prostaglandin D stimulus	3	0.0019285	0.0356654	PTGIR, TNC, PTGFR	880	6	16792	9.54091	1	0.953022	48.3425
BP	GO:0050679~positive regulation of epithelial cell proliferation	8	0.00514268	0.0364556	EYA1, IL6, OSR2, C5AR1, HTRA1, IGF1, NR4A3, BMP6	880	60	16792	2.54424	1	0.95259	49.107
BP	GO:0032543~mitochondrial translation	6	0.00385701	0.0381427	MRPS17, HARS2, HARS, MRPL47, GATB, GATC	880	36	16792	3.1803	1	0.955618	50.7037
BP	GO:0098655~cation transmembrane transport	7	0.00449984	0.0381578	CALHM2, SLC41A2, ANO1, CHRNA5, CHRNA7, ATP13A3, SLC30A9	880	48	16792	2.78277	1	0.95226	50.7177
BP	GO:0002063~chondrocyte development	4	0.00257134	0.0405914	MSX2, FGF18, SULF1, RUNX2	880	15	16792	5.08848	1	0.957774	52.937
BP	GO:0008631~intrinsic apoptotic signaling pathway in response to oxidative stress	4	0.00257134	0.0405914	PDK1, MAP3K5, BCL2, ARL6IP5	880	15	16792	5.08848	1	0.957774	52.937
BP	GO:0007155~cell adhesion	34	0.0218564	0.0406118	PCDHA7, ITGAL, CCL2, TLN2, TNC, COL28A1, SPOCK1, ITGBL1, VCAM1, LAMB4, CD9, DGCR2, LGALS3BP, FAP, TOR1A, AATF, COL8A1, GPNMB, THBS2, CEACAM1, SPON1, COL18A1, AIMP1, FLOT2, NLGN1, SIRPA, EPHA3, OMD, CD99L2, VCAN, CNTN3, PDZD2, SELE, IL2	880	459	16792	1.41347	1	0.954697	52.9552
BP	GO:0044267~cellular protein metabolic process	12	0.00771402	0.0450701	ZDHHC2, SNCAIP, L2HGDH, PAPPA, BACE1, LMCD1, IGF1, HIST1H3E, IGFBP2, IGFBP3, NPPA, CCDC59	880	118	16792	1.94052	1	0.965457	56.7765
BP	GO:0032981~mitochondrial respiratory chain complex I assembly	8	0.00514268	0.0457374	TIMMDC1, NDUFAF6, OXA1L, NDUFA9, FOXRED1, TMEM126B, NDUFS2, NDUFB1	880	63	16792	2.42309	1	0.964644	57.3226
BP	GO:0001657~ureteric bud development	6	0.00385701	0.046665	SMAD9, SMAD7, SMAD6, SIX1, FOXC2, RARB	880	38	16792	3.01292	1	0.964532	58.0709
BP	GO:0006182~cGMP biosynthetic process	4	0.00257134	0.0480694	NPPB, HTR2B, AQP1, NPPA	880	16	16792	4.77045	1	0.965625	59.1802
BP	GO:2001014~regulation of skeletal muscle cell differentiation	3	0.0019285	0.0482242	RBFOX1, NR1D2, SIX1	880	7	16792	8.17792	1	0.963576	59.3007
BP	GO:0061051~positive regulation of cell growth involved in cardiac muscle cell development	3	0.0019285	0.0482242	EDN1, AKAP6, IGF1	880	7	16792	8.17792	1	0.963576	59.3007
BP	GO:0090091~positive regulation of extracellular matrix disassembly	3	0.0019285	0.0482242	CLASP1, CLASP2, TGFB2	880	7	16792	8.17792	1	0.963576	59.3007
BP	GO:0032496~response to lipopolysaccharide	15	0.00964252	0.049138	C5AR1, PTGS2, MAOB, CXCL2, EDN1, ADH5, PTGFR, JUNB, VCAM1, PTGIR, PPBP, HDAC1, FMO1, CNR1, SELE	880	164	16792	1.74529	1	0.963461	60.0056
CC	GO:0005739~mitochondrion	140	0.0899969	3.36268e-16	FASTKD3, RAD51C, OXA1L, ALDH1L1, TARS2, DTYMK, LDHD, TMEM143, MRPS31, FAM210A, PDHB, FAHD1, CASP8AP2, STARD7, CPOX, COQ8A, TIMM9, MRPL39, HADH, GPT2, WWOX, MTUS1, ACAA2, TIMMDC1, STAP1, RPUSD2, QDPR, PPP1CC, SARS2, MARK2, EARS2, LETM1, HSPB7, MAPK3, MRPL49, HARS, MRPL47, TFB1M, MRPL46, GATB, GATC, GLUD2, PTRH2, ACAT1, HADHA, MRS2, BLOC1S2, GSTK1, HARS2, DHODH, IDH2, NRDC, SUGCT, FH, MRPS27, MRPS2…	941	1331	18224	2.03706	1.89182e-13	1.89182e-13	4.88498e-13
CC	GO:0005759~mitochondrial matrix	55	0.0353559	2.50563e-14	TARS2, DTYMK, ACOT2, TRMT10C, PDHB, MCCC2, ACSS1, ALAS1, MTG2, ABHD10, ACAD8, HADH, SUCLA2, DHTKD1, NDUFS2, GPT2, ACO2, CYP11A1, ACADS, ALDH5A1, DECR1, SARS2, EARS2, TRAP1, ALDH7A1, CHPF, TFB1M, PMPCB, COASY, GLRX5, NFS1, WARS2, PIN4, ACAT1, DIMT1, NUDT9, GSTK1, HARS2, ETFDH, IDH2, PDHX, ETFB, FH, PDK1, MTHFD2L, NDUFA9, BCKDHB, CS, DLAT, IDH3A, LACTB2, TSFM, ALDH2, CARS2, BCO2	941	327	18224	3.25738	1.42517e-11	7.12586e-12	3.67817e-11
CC	GO:0005743~mitochondrial inner membrane	56	0.0359987	1.15883e-09	OXA1L, NDUFAF6, COX10, LDHD, MRPS31, FAHD1, MTG2, CPOX, TIMM9, MRPL39, HADH, OMA1, TIMMDC1, ACAA2, SLC25A4, CYP11A1, SLC25A5, TMEM126B, COQ9, TIMM22, TRAP1, LETM1, SLC25A34, MRPL49, MRPL47, MRPL46, GPAM, UQCRB, MRPS17, SAMM50, LETM2, ACAT1, HADHA, NDUFB1, MRS2, GSTK1, CKMT2, ETFDH, IDH2, DHODH, MRPS27, MTHFD2L, IMMT, MRPS25, MAOB, MRPL30, ABCB7, VDAC2, AFG3L2, TTC19, SDHA, L2HGDH, SDHC, FOXRED1, …	941	441	18224	2.45925	6.58217e-07	2.19406e-07	1.69867e-06
CC	GO:0005615~extracellular space	98	0.0629978	0.00047382	FGF18, IL18, EDN1, FAM20C, FSTL3, SELENBP1, DLK1, FGF12, TGFB2, OGN, HIST1H2BK, APOD, SERPINE2, PAPPA, HTRA1, FAP, SERPINE1, CCBE1, CFH, LGI1, MTUS1, SPON1, RNLS, BPIFA1, IL27, CBLN3, PPBP, CSTB, HSPB1, STC1, ADAMTS3, LALBA, PODN, CCL2, CCL8, TIMP1, SIAE, LGALS3BP, KLKB1, TCTN1, COL18A1, EEF1A1, S100A11, LMCD1, MSTN, CD63, ECM1, OMD, CXCL16, BMP6, BMP8A, FGF5, AEBP1, PRDX4, EIF2A, UTP11, CFHR1, S…	941	1347	18224	1.40901	0.236005	0.0650839	0.692304
CC	GO:0070062~extracellular exosome	181	0.116353	0.000894472	ALDH1L1, GNPDA1, CNDP2, IL18, LSM6, FAM20C, SELENBP1, SYT7, AQP1, SLC7A5, PDHB, CMBL, OGN, SLC2A5, PACSIN3, H2AFV, SLC2A4, APOD, IFT20, HTRA1, SERPINE1, CFH, PLS1, RAPGEF3, NQO1, AUP1, ACAA2, CAPNS1, RAN, QDPR, FBP1, MGP, SIRPA, PLAUR, CFAP70, CD38, PSMA5, MAPK3, PGM1, CSTB, RYR2, HSPB1, DSP, MGAT5, ADAMTS3, ANKFY1, SH3GL2, MYL6, ITGAL, COASY, PIN4, DAAM2, ACAT1, TIMP1, GPD1L, SIAE, LGALS3BP, RPS…	941	2811	18224	1.24702	0.398475	0.0966611	1.30318
CC	GO:0031012~extracellular matrix	28	0.0179994	0.00301281	MYL6, AEBP1, LUM, TNC, HADHA, PCOLCE, TGFB2, OGN, LGALS3BP, SERPINE2, HTRA1, SERPINE1, FBN2, COL8A1, THBS2, SPON1, COL18A1, ADAM11, RAN, SLC25A5, LMCD1, MGP, ECM1, BGN, DSP, HSPB1, VCAN, ADAMTS3	941	296	18224	1.83198	0.819831	0.248469	4.32659
CC	GO:0005829~cytosol	204	0.131138	0.00367572	PPP2R5D, LSM6, SRP68, SELENBP1, SYT7, GPCPD1, HOOK1, SHB, MAP3K5, SERPINE2, HTRA1, EIF1AX, MAP3K8, CCNA1, LSM1, WWOX, CAPNS1, RAN, MYLK3, RIC8B, VTI1A, MKS1, MAD2L1, MAPK3, PGM1, HARS, SH3GL2, IGF2BP3, GPD1L, RPS28, IDH2, CDA, TNKS, TCTN1, AMD1, FH, SMAD9, MOCS2, ADAL, SMAD7, SMAD6, UPB1, EPM2A, AGBL5, CDC23, CCT7, RGS2, RGS4, UBA2, NNMT, KCNAB2, CRCP, RASSF9, GLI2, N6AMT1, MCCC2, DHTKD1, IP6K3, …	941	3315	18224	1.19179	0.876517	0.258298	5.25485
CC	GO:0005730~nucleolus	62	0.0398557	0.00686682	FGF18, E2F5, LSM6, TCOF1, SRP68, SELENBP1, UTP11, MRPS31, WDR74, KLHL7, NONO, PLRG1, PRMT7, ORC4, SERTAD3, ZPR1, TSEN2, GNL2, AGAP2, MDN1, CEP85, POLR1E, RRP36, RAN, PPP1CC, NOC2L, SIX1, CSTB, CDCA7L, MRO, CRIPT, NFS1, GPRC5B, PIN4, BMS1, DIMT1, TRIM68, SMARCB1, RPL34, METTL1, THYN1, AATF, PAFAH1B2, RPL4, BHLHE40, APEX1, PHLDA1, ZC3H14, NOX4, EEF1A1, SMAD7, FXR1, NEDD1, DNAJB9, RASL11A, RGS2, AKT…	941	857	18224	1.40109	0.980036	0.386899	9.60707
CC	GO:0043209~myelin sheath	16	0.0102854	0.0120397	TCP1, ACO2, SLC25A4, SLC25A5, IMMT, ATP1A3, DLAT, VDAC2, IDH3A, SDHA, GPI, BCL2, TPPP, CA2, SUCLA2, EHD1	941	152	18224	2.03859	0.998972	0.534409	16.2684
CC	GO:0031463~Cul3-RING ubiquitin ligase complex	9	0.00578551	0.0214868	KLHL7, KLHL38, KLHL8, KBTBD12, KBTBD3, KLHL31, KLHL30, KEAP1, SPOP	941	67	18224	2.60149	0.999996	0.708803	27.2686
CC	GO:0045254~pyruvate dehydrogenase complex	3	0.0019285	0.0347031	DLAT, PDHX, PDHB	941	6	18224	9.68332	1	0.838584	40.4128
CC	GO:0005828~kinetochore microtubule	3	0.0019285	0.0347031	RAB11A, CLASP1, CLASP2	941	6	18224	9.68332	1	0.838584	40.4128
CC	GO:0071011~precatalytic spliceosome	5	0.00321417	0.0374865	PLRG1, RBMX2, SF3B6, SF3B5, SNRPG	941	25	18224	3.87333	1	0.836096	42.8824
CC	GO:0045177~apical part of cell	9	0.00578551	0.0389579	VCAM1, PARD6B, NEDD1, C5AR1, FAP, ADGRF5, MYL12B, CA2, AQP1	941	75	18224	2.324	1	0.823812	44.149
CC	GO:0030018~Z disc	12	0.00771402	0.0413027	JPH2, PPP1R12B, PSEN2, FHL2, ADRA1A, HSPB1, RYR2, KY, MYL12B, TRIM63, MYOZ3, MYL9	941	118	18224	1.96949	1	0.819369	46.1136
CC	GO:0005689~U12-type spliceosomal complex	5	0.00321417	0.0425545	RBM41, ZRSR2, SF3B6, SF3B5, SNRPG	941	26	18224	3.72435	1	0.807313	47.1358
MF	GO:0044822~poly(A) RNA binding	85	0.0546409	0.000905769	FASTKD3, CAST, LSM6, SRP68, TCOF1, TRMT10C, UTP11, MRPS31, MKRN2, NONO, DHX38, RAVER2, EIF1AX, U2AF1, MRPL39, GNL2, LSM1, NQO1, RCC1L, ZFP36, ACAA2, KHDRBS3, RPUSD2, RAN, RRP36, SLC25A5, PPP1CC, SARS2, NOC2L, MARK2, TRAP1, SEC61B, ADK, CSTB, RBMX2, DSP, HSPB1, TFB1M, UBAP2, SNRPG, RALYL, HDLBP, FAM98A, PCDH20, PABPC4, IGF2BP3, SF3B6, PIN4, BMS1, CCDC59, PUS7, DIMT1, RACK1, EIF3D, RPS28, BUD13, CC…	895	1129	16881	1.42004	0.622826	0.622826	1.43471
MF	GO:0015095~magnesium ion transmembrane transporter activity	6	0.00385701	0.00149417	CNNM4, MRS2, SLC41A2, NIPAL3, SLC41A1, NIPA1	895	17	16881	6.65698	0.799898	0.552673	2.35636
MF	GO:0009055~electron carrier activity	13	0.00835685	0.00274674	NOX4, GLRX5, ACADS, MAOB, QDPR, ADH5, SDHA, SDHC, ETFDH, ALDH2, ACAD8, NDUFS2, ETFB	895	90	16881	2.72443	0.948158	0.627127	4.29149
MF	GO:0003824~catalytic activity	20	0.0128567	0.00523075	ECH1, ALDH1L1, BCKDHB, PHKA1, NFS1, ISOC1, ACSS2, RIMKLA, ALAS1, ACSS1, BCHE, SULF1, DHODH, NRDC, SUCLA2, SUGCT, GPT2, PMPCB, FH, ENOSF1	895	188	16881	2.00654	0.996458	0.756043	8.02328
MF	GO:0050660~flavin adenine dinucleotide binding	10	0.00642835	0.00631494	SDHA, NOX4, FMO5, FMO1, ACADS, FOXRED2, LDHD, MAOB, ETFDH, ACAD8	895	64	16881	2.9471	0.998904	0.744181	9.60895
MF	GO:0005515~protein binding	501	0.32206	0.00915386	OXA1L, PTGS2, LSM6, PPP2R5D, LDHD, MED25, STOML1, FSTL3, CXORF40A, SELENBP1, WDR74, AGTR1, OGN, MAP3K5, HTR1A, DHX38, SERPINE2, FAP, MAP3K8, SERPINE1, LSM1, CCNA1, AUP1, TIMMDC1, ACAA2, AIG1, VPS45, YIF1A, MARK2, PLAUR, WDR83, MKS1, TAGLN, TMEM139, BACE1, MAPK3, RYR2, ADAMTS3, SH3GL2, GATC, PPP2R3A, PABPC4, SORCS1, CACNB2, HADHA, JRK, RPS28, DUSP13, KLKB1, TNKS, SGIP1, FH, SPOP, ZC3H14, C9ORF16, …	895	8785	16881	1.07565	0.99995	0.807787	13.6404
MF	GO:0016491~oxidoreductase activity	20	0.0128567	0.00995991	NOX4, RNLS, SC5D, ALDH1L1, PYROXD1, FOXRED2, MAOB, PRDX4, ADH5, CYB5RL, SDHA, ALDH7A1, L2HGDH, HSDL2, ETFDH, ALDH2, FOXRED1, APEX1, WWOX, RDH13	895	200	16881	1.88615	0.999979	0.785331	14.754
MF	GO:0008083~growth factor activity	17	0.0109282	0.0121485	FGF5, FGF18, IL6, FGF14, MSTN, IGF1, FGF12, TIMP1, TGFB2, INHBB, OGN, GPI, DKK1, PPBP, BMP6, IL2, BMP8A	895	162	16881	1.97929	0.999998	0.806791	17.7101
MF	GO:0005539~glycosaminoglycan binding	5	0.00321417	0.0131787	EGFLAM, BGN, SERPINE2, SPOCK2, VCAN	895	18	16881	5.23929	0.999999	0.79527	19.068
MF	GO:0033592~RNA strand annealing activity	3	0.0019285	0.015649	EIF4B, EIF4H, FXR1	895	4	16881	14.1461	1	0.816795	22.2391
MF	GO:0001965~G-protein alpha-subunit binding	5	0.00321417	0.0160076	RGS2, RGS4, F2RL1, RIC8B, HTR2B	895	19	16881	4.96354	1	0.793715	22.6895
MF	GO:0008289~lipid binding	15	0.00964252	0.0295413	HDLBP, PTGS2, BPIFA1, FABP12, PCTP, COQ9, MTTP, MARK2, PACSIN3, APOD, STARD7, ACOT11, RASGRP2, BPIFA4P, SH3GL2	895	151	16881	1.87365	1	0.932037	38.0102
MF	GO:0004222~metalloendopeptidase activity	12	0.00771402	0.0370684	ADAM11, MBTPS2, ADAMTSL2, PAPPA, FAP, OSGEPL1, ADAMTS3, TLL2, NRDC, AFG3L2, PMPCB, OMA1	895	113	16881	2.00299	1	0.956126	45.2489

## Sheet: KEGG
Term	Count	%	PValue	Genes	List Total	Pop Hits	Pop Total	Fold Enrichment	Bonferroni	Benjamini	FDR
hsa01200:Carbon metabolism	22	0.0141424	1.34159e-06	ACO2/ACADS/GLUD2/CS/ADH5/FBP1/PFKM/DLAT/PSPH/ACSS2/ACAT1/HADHA/IDH3A/PDHB/SDHA/GPI/ACSS1/SDHC/IDH2/SUCLA2/GPT2/FH	396	113	6879	3.38201	0.000360822	0.000360822	0.00176291
hsa01100:Metabolic pathways	105	0.0674976	7.13774e-06	SC5D/GNPDA1/PTGS2/CNDP2/DTYMK/ACSS2/PDHB/CMBL/FAHD1/ACSS1/CPOX/HADH/GPT2/ACAA2/FBP1/QDPR/LPCAT4/EARS2/CD38/CHPF/PGM1/MGAT5/GATB/GATC/LALBA/COASY/GCNT2/GLUD2/ACAT1/HADHA/POLE2/IDH2/DHODH/CDA/AMD1/FH/MGAT4B/MOCS2/B4GAT1/UPB1/MAOB/DLAT/RIMKLA/IDH3A/AK9/ALDH2/COX6A1/NNMT/COX10/ACOT2/PIP5K1B/PSPH/MCCC2/ST6GALNAC6/ALAS1/PLCB4/ACAD8/PTDSS1/SUCLA2/AGPAT3/NDUFS2/POLR1E/CYP11A1/ACO2/ALDH5A1/ACADS/ATP6V1H/P…	396	1219	6879	1.49629	0.00191822	0.000959569	0.009379
hsa01130:Biosynthesis of antibiotics	29	0.0186422	2.68546e-05	SC5D/ADH5/ACSS2/PSPH/ACAT1/HADHA/PDHB/CMBL/ACSS1/IDH2/SUCLA2/HADH/FH/ACAA2/ACO2/CS/BCKDHB/FBP1/DLAT/PFKM/AK9/IDH3A/SDHA/GPI/ALDH7A1/SDHC/PGM1/ALDH2/PCYOX1	396	212	6879	2.37625	0.00719795	0.0024051	0.0352827
hsa00020:Citrate cycle (TCA cycle)	10	0.00642835	3.00933e-05	SDHA/ACO2/SDHC/CS/IDH2/DLAT/SUCLA2/IDH3A/PDHB/FH	396	30	6879	5.7904	0.00806255	0.00202176	0.0395371
hsa00280:Valine, leucine and isoleucine degradation	10	0.00642835	0.00120129	ACAA2/MCCC2/ALDH7A1/ACADS/BCKDHB/ALDH2/ACAD8/HADH/ACAT1/HADHA	396	47	6879	3.696	0.276274	0.0626217	1.56711
hsa00620:Pyruvate metabolism	9	0.00578551	0.00166814	ALDH7A1/ACSS1/LDHD/ALDH2/DLAT/ACSS2/ACAT1/PDHB/FH	396	40	6879	3.90852	0.361801	0.0721181	2.16998
hsa00071:Fatty acid degradation	9	0.00578551	0.00231526	CPT1C/ACAA2/ALDH7A1/ACADS/ADH5/ALDH2/HADH/ACAT1/HADHA	396	42	6879	3.7224	0.46395	0.0852234	3
hsa00970:Aminoacyl-tRNA biosynthesis	11	0.00707118	0.00407351	TARS2/HARS2/HARS/WARS2/CARS2/TARSL2/AARS2/GATB/SARS2/EARS2/GATC	396	66	6879	2.8952	0.666466	0.128249	5.22244
hsa00010:Glycolysis / Gluconeogenesis	11	0.00707118	0.0045501	GPI/ALDH7A1/ACSS1/PGM1/ADH5/ALDH2/FBP1/DLAT/PFKM/ACSS2/PDHB	396	67	6879	2.85199	0.706761	0.127426	5.8167
hsa04022:cGMP-PKG signaling pathway	18	0.011571	0.00890842	SLC25A4/SLC25A5/MYLK3/ATP1A3/RAF1/PDE3A/PPP1CC/VDAC2/MYL9/AGTR1/ATF4/ADRB2/PLCB4/ADRB1/RGS2/MAPK3/ADRA1A/NPPB	396	158	6879	1.979	0.909924	0.213931	11.0936
hsa04261:Adrenergic signaling in cardiomyocytes	16	0.0102854	0.0124275	PPP2R3A/PPP2R5D/ATP1A3/CACNB2/PPP1CC/TNNT2/AGTR1/ATF4/ADRB2/PLCB4/ADRB1/BCL2/MAPK3/ADRA1A/RYR2/RAPGEF3	396	138	6879	2.01405	0.965401	0.263475	15.1536
hsa01210:2-Oxocarboxylic acid metabolism	5	0.00321417	0.0140237	ACO2/CS/IDH2/GPT2/IDH3A	396	17	6879	5.10918	0.977609	0.271371	16.9381
hsa04020:Calcium signaling pathway	19	0.0122139	0.0140806	SLC25A4/SLC25A5/MYLK3/PHKA1/PTGFR/VDAC2/GRM1/CD38/AGTR1/ADRB2/PLCB4/ADRB1/PDE1C/AVPR1A/PLCD3/ADRA1A/RYR2/CHRNA7/HTR2B	396	179	6879	1.84387	0.977954	0.2543	17.0011
hsa04270:Vascular smooth muscle contraction	14	0.00899969	0.0162467	MYL6/ACTA2/MYLK3/PPP1R12B/RAF1/PPP1CC/MYL9/AGTR1/PTGIR/PLCB4/ARAF/MAPK3/AVPR1A/ADRA1A	396	117	6879	2.07861	0.987799	0.270016	19.3656
hsa00650:Butanoate metabolism	6	0.00385701	0.0172258	L2HGDH/ALDH5A1/ACADS/HADH/ACAT1/HADHA	396	27	6879	3.86027	0.990666	0.267732	20.4138
hsa04668:TNF signaling pathway	13	0.00835685	0.019168	IL6/CCL2/PTGS2/SOCS3/CXCL2/EDN1/JUNB/VCAM1/MAP3K5/ATF4/MAPK3/MAP3K8/SELE	396	107	6879	2.11052	0.994518	0.277755	22.4559
hsa05144:Malaria	8	0.00514268	0.0207592	VCAM1/ITGAL/IL6/CCL2/IL18/THBS2/SELE/TGFB2	396	49	6879	2.83612	0.996458	0.28247	24.0928
hsa04350:TGF-beta signaling pathway	11	0.00707118	0.021395	INHBB/SMAD9/E2F5/SMAD7/SMAD6/MAPK3/ID4/ID3/TGFB2/BMP8A/BMP6	396	84	6879	2.2748	0.997026	0.276176	24.7379
hsa00240:Pyrimidine metabolism	12	0.00771402	0.0294971	POLR2H/POLR3F/POLE2/POLR1E/UPB1/DTYMK/DHODH/CDA/POLR3GL/ENTPD3/UCK2/AK9	396	101	6879	2.06391	0.999682	0.345511	32.5269
hsa05143:African trypanosomiasis	6	0.00385701	0.0382813	VCAM1/IL6/PLCB4/IL18/F2RL1/SELE	396	33	6879	3.1584	0.999972	0.408443	40.1255
hsa03060:Protein export	5	0.00321417	0.0398138	OXA1L/SEC61B/SEC11C/SRP68/SEC61G	396	23	6879	3.77635	0.999982	0.405732	41.3672
hsa04066:HIF-1 signaling pathway	11	0.00707118	0.0478685	PDK1/IL6/BCL2/MAPK3/EDN1/SERPINE1/IGF1/IFNGR2/NPPA/PDHB/TIMP1	396	96	6879	1.99045	0.999998	0.451064	47.5113
