# Supplementary material for: Potential Molecular Mechanism of the NPPB Gene in Postischemic Heart Failure with and without T2DM
Source: Biomed Res Int. 2020 Aug 3;2020:2159460. doi: 10.1155/2020/2159460 (PMC7424400; doi:10.1155/2020/2159460)
Supplement: Supplementary 7 — Table S3: the GO and KEGG pathways in both groups. [file 2159460.f7.xlsx]

## Sheet: GO
Category	Term	Count	%	PValue	Genes	List Total	Pop Hits	Pop Total	Fold Enrichment	Bonferroni	Benjamini	FDR
BP	GO:0006099~tricarboxylic acid cycle	4	0.0154464	0.00219416	ACO2, SDHC, CS, PDHB	152	29	16792	15.2377	0.894988	0.894988	3.42196
BP	GO:0045471~response to ethanol	6	0.0231696	0.00258305	VCAM1, CCL2, SLC2A4, TNC, MAOB, NQO1	152	105	16792	6.31278	0.929606	0.734681	4.01689
BP	GO:0001503~ossification	5	0.019308	0.00585566	PDLIM7, FSTL3, MGP, RUNX1, BMP8A	152	80	16792	6.90461	0.997584	0.865813	8.88915
BP	GO:0006635~fatty acid beta-oxidation	4	0.0154464	0.00720926	CPT1C, ECH1, DECR1, ACAT1	152	44	16792	10.0431	0.999403	0.843684	10.8358
BP	GO:0030198~extracellular matrix organization	7	0.0270312	0.00863816	VCAM1, EGFLAM, BGN, TNC, SERPINE1, VCAN, MFAP2	152	196	16792	3.94549	0.999864	0.831404	12.8485
BP	GO:1904659~glucose transmembrane transport	3	0.0115848	0.0124258	PPBP, SLC2A4, SLC5A1	152	19	16792	17.4432	0.999997	0.882124	17.9794
BP	GO:0035584~calcium-mediated signaling using intracellular calcium source	3	0.0115848	0.0137257	VCAM1, RYR2, PTGFR	152	20	16792	16.5711	0.999999	0.868103	19.6742
BP	GO:0005980~glycogen catabolic process	3	0.0115848	0.0150819	PYGM, PFKM, AGL	152	21	16792	15.782	1	0.857582	21.4073
BP	GO:0001666~response to hypoxia	6	0.0231696	0.0196666	VCAM1, CD38, CCL2, RYR2, NPPA, TGFB2	152	172	16792	3.85373	1	0.8961	27.0101
BP	GO:0005977~glycogen metabolic process	3	0.0115848	0.0278278	PYGM, EPM2A, PPP1R3A	152	29	16792	11.4283	1	0.944734	36.0688
BP	GO:0009060~aerobic respiration	3	0.0115848	0.035358	COX10, SDHC, COX6A1	152	33	16792	10.0431	1	0.965183	43.4827
BP	GO:0015758~glucose transport	3	0.0115848	0.035358	PPBP, SLC2A4, SLC5A1	152	33	16792	10.0431	1	0.965183	43.4827
BP	GO:0042060~wound healing	4	0.0154464	0.0354299	TNC, DSP, TGFB2, TIMP1	152	80	16792	5.52368	1	0.954234	43.5494
BP	GO:0015936~coenzyme A metabolic process	2	0.0077232	0.0354904	MCCC2, ACAT1	152	4	16792	55.2368	1	0.942267	43.6054
BP	GO:0010757~negative regulation of plasminogen activation	2	0.0077232	0.0441657	SERPINE2, SERPINE1	152	5	16792	44.1895	1	0.963497	51.1306
BP	GO:0032570~response to progesterone	3	0.0115848	0.0479272	CD38, CCL2, TGFB2	152	39	16792	8.49798	1	0.965243	54.0916
CC	GO:0005759~mitochondrial matrix	13	0.0502008	2.89085e-05	MCCC2, ALAS1, ACO2, ALDH5A1, NDUFA9, CS, ACOT2, NFS1, DECR1, NDUFS2, ACAT1, BCO2, PDHB	159	327	18224	4.55661	0.00605248	0.00605248	0.036517
CC	GO:0031012~extracellular matrix	12	0.0463392	5.59844e-05	AEBP1, BGN, SERPINE2, HTRA1, TNC, SERPINE1, MGP, DSP, VCAN, THBS2, PCOLCE, TGFB2	159	296	18224	4.64661	0.0116882	0.00586128	0.070708
CC	GO:0005739~mitochondrion	27	0.104263	7.70019e-05	ECH1, COX10, LDHD, NFS1, ACOT2, TMEM143, ACAT1, PDHB, SPHKAP, MCCC2, ALAS1, CKMT2, COQ8A, NDUFS2, CPT1C, ACO2, ALDH5A1, NDUFA9, MRPS25, CS, MAOB, COQ9, DECR1, CLIC1, SDHC, MRPL46, BCO2	159	1331	18224	2.32505	0.016041	0.00537584	0.097241
CC	GO:0005615~extracellular space	26	0.100402	0.000238281	AEBP1, CCL2, PODN, TNC, FSTL3, SELENBP1, FGF12, GPRC5B, PCOLCE, TGFB2, TIMP1, VCAM1, SIAE, SERPINE2, HTRA1, PAPPA, SCRG1, SERPINE1, SCG2, RNLS, CLIC1, PPBP, NPPB, VCAN, NPPA, BMP8A	159	1347	18224	2.21234	0.0488133	0.0124333	0.300628
CC	GO:0070062~extracellular exosome	42	0.162187	0.000416059	AEBP1, ECH1, SLC5A1, ACOT2, SELENBP1, GPRC5B, ACAT1, PCOLCE, PDHB, CMBL, TIMP1, PTER, SPHKAP, VCAM1, SIAE, TMEM109, ST13P4, SLC2A4, ARPC3, IFT20, HTRA1, SERPINE1, GALNT16, NQO1, CEACAM1, AUP1, UPB1, CS, MAOB, MGP, PFKM, CLIC1, DECR1, ANXA3, CYSTM1, CD38, BGN, PYGM, RYR2, DSP, PCYOX1, PRSS23	159	2811	18224	1.71252	0.0836808	0.0173262	0.524381
CC	GO:0005743~mitochondrial inner membrane	11	0.0424776	0.00518197	COX10, CKMT2, SDHC, MRPS25, LDHD, MAOB, COX6A1, COQ9, MRPL46, ACAT1, TIMM22	159	441	18224	2.85891	0.664134	0.166266	6.35316
CC	GO:0031093~platelet alpha granule lumen	4	0.0154464	0.0120677	PPBP, SERPINE1, TGFB2, TIMP1	159	55	18224	8.33573	0.921889	0.30527	14.2206
CC	GO:0005604~basement membrane	4	0.0154464	0.0313198	EGFLAM, TNC, THBS2, TIMP1	159	79	18224	5.80336	0.998747	0.566253	33.1036
MF	GO:0005539~glycosaminoglycan binding	4	0.0154464	0.000470154	EGFLAM, BGN, SERPINE2, VCAN	147	18	16881	25.5193	0.151362	0.151362	0.640835
MF	GO:0005102~receptor binding	10	0.038616	0.00363348	ECH1, CCL2, SERPINE2, SERPINE1, F2RL1, ACOT2, NPPB, DDO, NPPA, TGFB2	147	353	16881	3.25317	0.719279	0.470169	4.85458
MF	GO:0050681~androgen receptor binding	3	0.0115848	0.0467849	TRIM68, NCOA4, FHL2	147	40	16881	8.61276	1	0.996205	48.0579

## Sheet: KEGG
Term	Count	%	PValue	Genes	List Total	Pop Hits	Pop Total	Fold Enrichment	Bonferroni	Benjamini	FDR
hsa01100:Metabolic pathways	26	0.100402	0.000619438	COX10, NFS1, ACOT2, ACAT1, PDHB, CMBL, MCCC2, ALAS1, PLCB4, CKMT2, GALNT16, PTDSS1, NDUFS2, AGL, ACO2, ALDH5A1, NDUFA9, UPB1, CS, MAOB, PFKM, LPCAT4, CD38, PYGM, SDHC, COX6A1	75	1219	6879	1.95629	0.102207	0.102207	0.756034
hsa00020:Citrate cycle (TCA cycle)	4	0.0154464	0.00393873	ACO2, SDHC, CS, PDHB	75	30	6879	12.2293	0.496762	0.290607	4.71861
hsa01200:Carbon metabolism	6	0.0231696	0.00716802	ACO2, SDHC, CS, PFKM, ACAT1, PDHB	75	113	6879	4.87009	0.713989	0.341139	8.43381
hsa01130:Biosynthesis of antibiotics	8	0.0308928	0.00748299	ACO2, SDHC, CS, PCYOX1, PFKM, ACAT1, PDHB, CMBL	75	212	6879	3.46113	0.729352	0.278724	8.78896
hsa05144:Malaria	4	0.0154464	0.0154543	VCAM1, CCL2, THBS2, TGFB2	75	49	6879	7.48735	0.933466	0.418421	17.3667
hsa00630:Glyoxylate and dicarboxylate metabolism	3	0.0115848	0.0336933	ACO2, CS, ACAT1	75	27	6879	10.1911	0.99743	0.629886	34.2807
hsa04260:Cardiac muscle contraction	4	0.0154464	0.0465164	TNNT2, CACNB2, COX6A1, RYR2	75	75	6879	4.89173	0.999749	0.693955	44.2
hsa05143:African trypanosomiasis	3	0.0115848	0.0486426	VCAM1, PLCB4, F2RL1	75	33	6879	8.33818	0.999829	0.661955	45.705
